# Supplementary material
Source: PubMed Central journal article supplement (PMC2577264)
Supplement: pp.108.126516_1.pdf [file pp.108.126516_1.pdf]

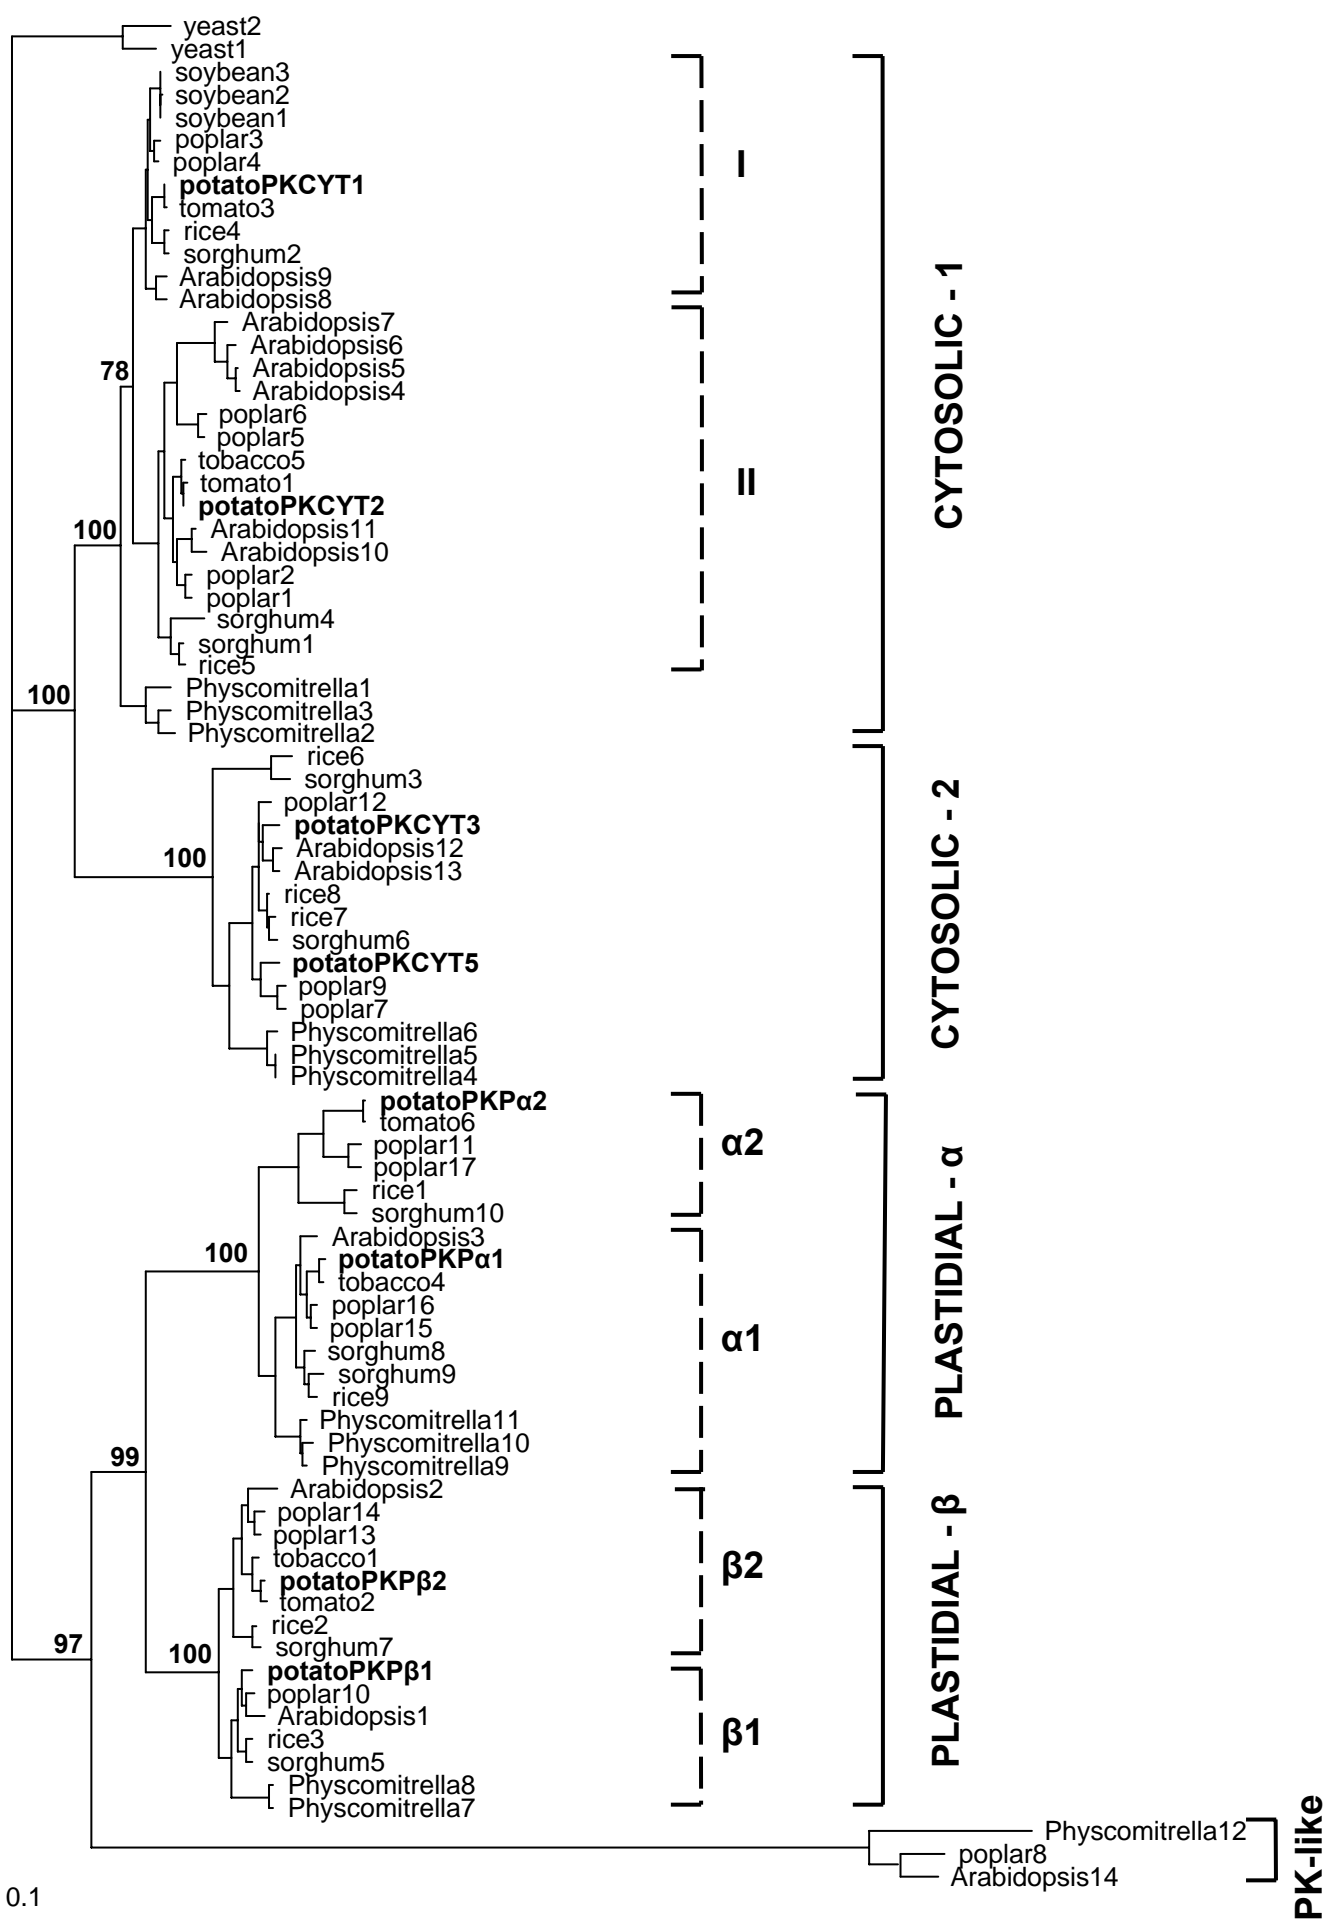

SUPPLEMENTARY FIGURE S1

**Supplementary Figure S1.** Protein sequences were deduced from cDNA or EST sequences obtained from the Phytozome interface of the Joint Genome Institute (JGI) and from the National Center for Biotechnology Information (NCBI) for *Arabidopsis thaliana* (Arabidopsis), *Glycine max* (soybean), *Nicotiana tabacum* (tobacco), *Oryza sativa* (rice), *Physcomitrella patens* (Physcomitrella), *Populus trichocarpa* (poplar), *Saccharomyces cerevisiae* (yeast1), *Saccharomyces bayanus* (yeast2), *Solanum esculentum* (tomato), *Solanum tuberosum* (potato) and *Sorghum bicolor* (sorghum). The sources for the sequences are as follows: the JGI gene names are given for Physcomitrella, poplar, and sorghum sequences; the genome annotations are given for the Arabidopsis and rice sequences; the NCBI accession numbers are given for the tobacco, soybean, yeast, potatoPKCYT1 and tomato7 sequences; the TIGR Transcript Contig (TC) codes are given for the rest of the potato and tomato sequences. Regions of the deduced protein sequences that were judged to be incorrectly annotated or missing from the current gene models are highlighted in yellow.

>Arabidopsis1 At5g52920

MAQVVATRISIQGSMLSPNGGSSVSTRSEKLLKPPASFAVKVLGNEAKRSGRVSVRSRRVVDTTVRSARVETEVI PVS  
 PEDVPNREEQLERLLEMQQFGDTSVGMWSKPTVRRKTKIVCTVGPSTNTREMIWKLAEAGMNVARMNMSHGHDHAS  
 HKKVIDLVKEYNAQTKDNTIAIMLDTKGPEVRSGLDLPQPIMLDPPQEFFTTIERGVSTPSCVSVNYDDFVNDVEA  
 GDMLLVDDGMMSEFMVSKTKKDSVKCEVVDGGELKSRRLNVRGKSATLPSITTEKDWEDIKFGVENKVDYFVAVSFV  
 KDAQVVHELKYLQNSGADIHVIVKIESADSI PNLSIIITASDGAMVARGDLGAELPIEEVPI LQEEI INLCRSM  
 GKAVIVATNMLESMIVHPTPTRAEVSDIAIAVREGADAVMLSGETAHGKFP LKAAGVMHTVALRTEATITSGEMP  
 PNLGQAFKNHMSEMFAYHATMMSNTLGTSTVVFTRTGFMALLSHYRPSGTIYAF TNEKKIQORLALYQGVCP IY  
 MEFTDDAEEETFANALATLLKQGMVKKGEEIAIVQSGTQPIWRSQSTHNIQVRKV

>Arabidopsis2 At1g32440

MAAYGQISSGMTVDPQVLSSRNIGVSLSPLRRTLIGAGVRSSTISLRQCSSLVRSIKISEDSRKP KAYAENGAF  
 DVGVLDDSSSYRLADSRSSNDSRRKTKIVCTIGPSSSSREMIWKLAEAGMNVARLNMSHGDDHASHQITIDL VKEY  
 NSLFVDKAI AIMLDTKGPEVRSGLDVPQPIFLEEQQEFNFTIKRGVSLKDTVSVNYDDFVNDVEVGDILLVDGMM  
 SLAVKSKTSDLVKCVVIDGGELQSRRLNVRGKSATLPSITDKDWEDIKFGVDNQVDFYAVSFVKDAKVVHELKN  
 YLKTCSADISVIVKIESADSIKNLPSIISACDGAMVARGDLGAELPIEEVPLLQEEI IRRCRSIHKPVIVATNML  
 ESMINHPTPTRAEVSDIAIAVREGADAIMLSGETAHGKFP LKAVNVMTVALRTEASLPVRTSASRTTAYKGHMG  
 QMFAFHASIMANTLSSPLIVFTRTGSMVLLSHYRPSATIFAFTNQRRIMQRLALYQGVMP IYMEFSDDAEDTYA  
 RSLKLLQDENMLKEGQHVTLVQSGSQPIWREESTHLIQVRKIKIGG

>Arabidopsis3 At3g22960

MSQSIQFSTPSHTPHLLHLPHSQFNRLSSISFRFPLTTIKYTSIRASSSSSPSPDLDDSSSSSSSSQVLLSPNG  
 TGAVKSDERSVVATAVTTDTSIEVDTVTEAELKENGFRSTRRTKLICTIGPATCGFEQLEALAVGGMNVARLNM  
 CHGTRDWHRGVIRSVRRLNEEKGFVAIIMMDEGSEIHMDDLGGEASAKAEDGEVWTF TVRAFDSSRPERTISVS  
 YDGF AEDVRVGD ELLVDGGMVRFVIEKIGPDVKCLCTDPGLLLPRANLTFWRDGS LVRERNAMLP TISSKDWLD  
 IDFGIAEGVDFIAVSFVKS AEVINHLKSYLAARSRGGEIGVIAKIESIDSLTNLEEI I LASDGAMVARGDLGAQI  
 PLEQVPAAQQRIVQVCRALNKPVIVASQLLES MIEYPTPTRAEVADVSEAVRQRSDALMLSGESAMGQFPDKALT  
 VLRTVSLRIERWWREKRHESVPLQAI GSSFSDKISEE ICNSAAKMANNLGVDAVFVYTTSGHMASLVSR CRPDC  
 PIFAFTTTT SVRRRLNLQWGLIPFRLSFSDDMESNLNKTFSLLKSRGMIKSGDLVIAVSDMLQSIQVMNV P

>Arabidopsis4 At3g55650

MEMLLGGQATNGALRSKTKI ICTLGPVSRVEMIEKLLKAGMNVARFNFSHGSHSYHQETLDNLRTAMDNTG ILS  
 AVMLDTKGPEI RTGFLKEGKPIQLNQQQEITISIDYMI EGDSNVISMSYKLAEDVKPGDVILCSDGTISLTVLS  
 CDKSFGLVRCRCENSAILGERKNVNLPGIVVDLPTL TEKDKEDI IQWGVPNKIDIIALS FVRKGS DLTEVRRLLG

EHSKNIMLSKVENQEGVMNCEKILENSDAFMVARGDLGMEIPIEKMFLAQKTMIKMANALGKPVVATQMLESM  
TVSPRPTRAEATDVANAVLDGTDCVMLSGETAAGAHPEAAVLTMSRICKAEEDFIDYDILHKKTLGMVSLPLSPI  
ESLAASVVSTAQSVFASAIIVVLTGGGYTAELVAKYRPSVPILSVIVPEIAQGNMEMSCSDSVAHAAARRGLIYRR  
IIPVVATGSSARDSNKDATEEMINLAIGFAKTKGICKNGDSIVALHKIDGSSVVKIVTVE

>Arabidopsis5 At3g55810

MEMLLGGRATNGALRSKTKIVCTLGPVSRVEMIEKLLKAETLDNLRRTAMNNTGILCAVMLDITKGPEIRTGFLKE  
GKPIQLNQQQEITISIDYKIEGDSNII SMSYKLAEDVKPGDVILCSDGTISLTVLSCDKSFGLVRCRCENSTIL  
GERKNVNLPGIVVDLPTLTKEDKEDI IQWGVNPKIDI IALSFVRKGSDDLTEVRKLLGEHSKNIMLSKVENQEGV  
MNCEKILENSDAFMVARGDLGMEIQIEKMFLAQKTMIKMANALGKPVVATQMLESM TVSPRPTRAEATDVANAV  
LDGTDCVMLSGETAAGAHPEAAVLTMSRICKAEEDFIDYDILHKKTLGMLSLPLSPIESLAASVVSTAQSVFASA  
IVVLTGGGYTAELVAKYRPSVPILSVIVPEIAQNDIEMSCSDSVAHVARRGLIYRGIIPVVATGSSARDSNKDA  
TEEMINLAIGFAKTKGICKNGDSIVALHKIDGSSVVKIVSVE

>Arabidopsis6 At3g25960

MEMLLGGQATNGALRSKTKIVCTLGPASRSVEMIEKLLKAGMNVARFNF'SHGSYSYHQETLDNLRRTAMDNTGILC  
AVMLDITKSPVIRTGFLKEGKPIQLKQGQEITISIDYKIQGDSNTISMSYKLAEDLKPVDVILCSDGTISLNVLS  
CDKYLGLVRCRCENSALLGERKNVNLPGIVVDLPTLTKEDKEDIMQWGVNPKIDI IALSFVRKGSDDLQVRKLLG  
EHSKSIMLSKVENQEGVMNFDKILENSDAFMVARGDLGMEIPIEKMFLAQKTMINKANAHGKPVVATQMLESM  
TVSPRPTRAEATDVANAVLDGTDCVMLSGETAAGAHPEAVLTMSRICKAEEDFIDYDILHKKTLGMVSLPLSPI  
ESLAASAVSTARSVFASAIIVVLTTRGGYTAELVAKYRPSVPILSVIMPEIAECSDSVAHVARRGLIYRGIIPVVG  
SARDSTEEMIRLAIGFAKTKGICKTGDSIVALHKIDGSSIVRIVSVE

>Arabidopsis7 At3g04050

MEKLLAGQTNNGSLKSKTKIVCTLGPASRSVEMIEKLLKAGMNVARFNF'SHGSYSYHQETLDNLRRTAMENTCIPC  
AVMLDITKGPEIRTGFLKEGKPVLEIQGQEITISTDYTMEGDSNTISMSYKLAEDLKSVDVILCSDGTISLTVLS  
CDKNLGLVRCRCENSALLGERKNVNLPGIVVDLPTLTKEDQEDILQWGVNPKIDI IALSFVRKGSDDLVEVRKLLG  
ENAKSIMLSKVENQEGVMNFDKILEYSDAFMVARGDLGMEIPIEKMFLAQKMMIQKANALGKPIVATQMLESM  
TKSPRPTRAEATDVANAVLDGTDCVMLSGETAAGAHPEAVLTMSRICKAEEDFIDYDTMHKKIQDIVSLPLSPI  
ESLAASAVSTARSLCAAIVVLTGGYTVELVAKYRPSVPILSVIVPEITRTDDFEWSCSESAAHVARRGLIYRG  
IIPVPMATGASARSSNKDSTEETIQFAIEFAKKGICKTGDSIVALHKIDGSSVVKILNVE

>Arabidopsis8 At5g08570

MSNIDIEGILKELPNDGRIPKTKIVCTLGPASRTVSMIEKLLKAGMNVARFNF'SHGSHEYHQETLDNLRRTAMHNT  
GILAAVMLDITKGPEIRTGFLKDGNIQLKQGQEITITTDYDIQGDDESTISMSYKLPDVKPGNTILCADGSISL  
AVLSCDPESGTVRCRCENSAMLGERKNVNLPGVVVDLPTLTDKDIEDILGWGVNPNIDMIALSFVRKGSDDLNVNR  
KVLGSHAKSIMLSKVENQEGVINFDLRETDAFMVARGDLGMEIPIEKIFLAQKMIYKCNLAGKPVVATQML  
LESMIKSPRPTRAEATDVANAVLDGTDCVMLSGESAAGAYPEIAVKMAKICIEAESLDYNTIFKEMIRATPLP  
MSPLESLASSAVRTANKAKAKLIIVLTRGGSTANLVAKYRPAVPILSVVVPVMTTDSFDWSCSDESPARHSLIYR  
GLIPMLAEGSAKATDSEATEVIEAALKSATQRGLCNRGDAIVALHRIGAASVIKICVVK

>Arabidopsis9 At5g63680

MSNIDIEGILKELPNDGRTPKTKIVCTLGPASRSVMTMIEKLLKAGMNVARFNF'SHGSHEYHQETLDNLRRTAMQNT  
GILAAVMLDITKGPEIRTGFLKDGNIQLKQGQEITITTDYDIKGDDEKTI SMSYKLPVDVKPGNTILCADGSISL  
AVVSCDPNAGTVICRCENTAMLGERKNVNLPGVVVDLPTLTDKDVEDILKWGVNPNIDMIALSFVRKGSDDLNVNR  
KVLGSHSKSIMLSKVENQEGVLFNFDLRETDAFMVARGDLGMEIPIEKIFLAQKMMIYKCNLAGKPVVATQML  
LESMIKSPRPTRAEATDVANAVLDGTDCVMLSGESAAGAYPEIAVKMAKICIEAESLDYNTIFKEMIRATPLP  
MSTLESASSAVRTANKAKAKLIIVLTRGGTTAKLVAKYRPAVPILSVVVPVFTSDFWCSDESAPARHSLIYR  
GLIPVLGEGSAKATDSEESTEEIEESALKSATEKGLCNHGDAVVALHRIGAASVIKICVVK

>Arabidopsis10 At4g26390

MAMEQRPKTKIVCTLGPASRSVPMVEKLLMAGMSVARFNF'SHGSYEHYHQETLDNLRQAMLNTGMLCAVMLDITKGP  
EIRTGFLKDGKPIQLKQGQEITISTDYDLKGDEKTI CMSYKLAQDVNPGMVICADGTISLKVLSCKDEKGTVR  
CRCENTSMGERKNVNLPGVVVDLPTLTKEDKQDILEWGVNPNQIDMIALSFVRKGSDDLQVRKLLGKHAKTILLM  
SKVENQEGVANFDDILINSDAFMIARGDLGMEIPIEKIFLAQKMIYKCNFMGKPVVATQMLESMIKSPRPTRA  
EATDVANAVLDGTDCVMLSGETAAGAYPELAVRTMAKICVEAESTLDYGDIFKRIMLHAAVPMSPMESLASSAVR  
TATSSRATLMMVLTTRGGSTARLVAKYRPGIPIILSVVVPVFTSDFWACSNEAPARHSLIYRGLVPLVYAGSARA  
SIDESTEETLEFASEYGKKKQLCKTGDSVVALFRTGNAIVIKILTVM

>Arabidopsis11 At5g56350

MAMIEQRPKTKIVCTLGPASRSVPMVEKLLRAGMNVARFNF'SHGSHEYHQETLDNLRHQAMLNTGILCAVMLDITKG  
PEIRTGFLKDGKPIQLKQGQEITISTDYDLKGDEKTI CMSYKLAQDVNPGMVICADGTISLLVLSCKENGTV  
RCRCENSAMLGERKNVNLPGVVVDLPTLTKEDKEDIMQWGVNPNQIDMIALSFVRKGSDDLQVRKLLGKHAKNILL  
MSKVENQEGVANFDDILVNSDAFMIARGDLGMEIPIEKIFLAQKMIYKCNIQGKPVVATQMLESMIKSPRPTR

AEATDVANAVLDGTDVMSGETAAGAYPELAVRTMAKICVEAESTLDYGDVFKRIMLYSPVPMSPLESLASSAV  
RTANSARATLIMVLTRGGSTARLVAKYRPGMPLSVVVEIKTDFFDWCSDES PARHSLIFRGLIPVLYAGSAR  
ASHDESTEEAIEFATQYQKEKELCKTGDSVVALLRVGNASVIKILTVK

>Arabidopsis12 At2g36580

MHSSHLLEEPIRMTSILEPSKSSFFPALTKIVGTGLGPKSRSVEVIAGCLKAGMSVARFDFSWCDADYHQETLEN  
LKIHAVKSTKKLCAVMLDVTGPELQVINKTEKAI SLKADGLVTLTPSQDQEASSEVLPINF DGLAKAVKKGDTIFV  
GQYLFTGSETTSVWLEVEEVKGDVVICISRNAATLGGPLFTLHVSVQHIDMPTLTKDKKEVISTWGVQNKIDFLS  
LSYCRHAEDVRQARELLNSCGDLSQTQIFAKIENEEGLTHFDEILQEADGIILSRGNLIGIDLPEEKVFLFQKAAL  
YKCNMAGKPAVLTRVVDSDMNDLNRPTRAEATDVANAVLDGSDAILLGAETLRGLYPVETISTVGRICCEAEKVFN  
QDLFFKKTVKYVGEPMTHLESIASSAVRAAIKVKASVICFTSSGRAARLIAKYRPTMPVLSVVI PRLT TNQLKW  
SFSGAFEARQSLIVRGLFPMLADPRHPAESTSATNESVLKVALDHGKQAGVIKSHDRVVVCQKVG DASVVKI IEL  
ED

>Arabidopsis13 At3g52990

MHSSHLLEEPIRMASILEPSKSSFFPALTKIVGTGLGPKSRSVEALSGCLKAGMSVARFDFSWGDADYHQETLDN  
LKVAVRSTKKLCAVMLDVTGPELQVINKSEKAITLKADGLVTLTPNQDQEASSEVLPINFENGLAKAVKKGDTIFV  
GQYLFTGSETTSVWLEVEEVKGDVVICLSRNAATLAGSLFTLHSSQVHIDLPTLTKDKKEVISTWGVQNKIDFLS  
LSYCRHAEDVRQTREMLKKGDLSDTQIFAKIENVEGLTHFDEILQEADGIILSRGNLIGIDLPEEKVFLFQKAAL  
YKCNMAGKPAVLTRVVDSDMNDLNRPTRAEATDVANAVLDGSDAILLGAETLRGLYPVETISTVGRICAEAEKVFN  
QDLYFKKTVKYVGEPMTHLESIASSAVRAAIKVKASVICFTSSGRAARLIAKYRPTMPVISVVI PRVKT NQLKW  
SFSGAFEARQSLIVRGLFPMLADPRHPAESTSATNESVLKVALDHGKHAGVIKSHDRVVVCQKVG DASVVKI IEL  
ED

>Arabidopsis14 At3g49160

MVGLDSSHLRLDKILCFSSRSHINNHKKT SYALSLNHMKLPIQRTLAFALARGKGEAESFSRLEATFGDNTSTE  
CTWSFD PDSK DAMSHLKSEADLSGNSGANNVASVIEKLNALRSHLLAAEKWNASQLHLCD SKYLECATNLVHYM  
ALRSLDIEQLNSHLASLGLSSLDNNNDVLAHLNASINLLMNDQNAVTESWTVNVPKGKSTKKNKGRVLSYKES  
LLGKLRGRSTHIMVTIGEEATLSETFITDILKAGTSVIRINCAHGDP SIWGEI IKRVRRTSQMLEMP CRVHMDL  
AGPKLRTGTLKPGPCVMKISP KDAYGNVVPALVWLCLTGT EPPAHVSPDATISVQGD FLAGLQIGDSIRLCD  
ARGKRRLKISKEFHVFNSTGFVAECFD TAYIESGTELSVKGKGRRLVGRVVDVPPKESFVRLKVG DDLVITRE  
GSLDEPSVTVPGAHRLTCPSGYLFD SVKPGETIGFDDGKIWGVIKGTS PSEVIVSITHARPKGTKLGSEK SINIP  
QSDIHFKGLTSKDIKLDYVASHADMVGISFIRDVHDITVLRQELKRRKLDLGLIVLKIETKSGFKNLSLILLEA  
MKCSNPLGIMIARGDLAVECGWERLANMQEEIIAICKAARVPVIMATQVLES LVKSGVPTRAEITDAANAKRASC  
VMLNKGKNIVEAVSMLDITLHTKLIYKKS DSEN LH

>Physcomitrella1 131669

MVTLSDTLQTDGHSRVSKTKIVCTLGPKSREVP ILEKLLRAGMNVARFNFSHGTFEYHQYTLDNLRQAQLNTG  
IMCAVLLDTKGPEIRTGQHKTKGPKMLIRGKEIWIITTDYSHLGDEHMI CMSYPKLAEHVSPGTEILCSDGTITFT  
VLECDVARGMVRRCENTTMLGEKKNVNLPGVVVDLPTITTKD TDDIVQWGI PNKIDFIAASFVRKGEDVKKIRA  
LLGSHAKTIQIISKVENQEGLVNFDDILRETDGIMVARGDLGMEIPTEKIFLAQKMMIYKCSAGKPVITATQML  
ESMIKYPTRAEATDVANAVLDGTDVMSGETANGSYPD LAVAVMSRICQEAESLDYSAIFKEIMKSVPLPM  
SPLESLASSAVRCAKVRASLIVLTRGGTTAKLVAKYRPSVPILSVAVPVLTTDSL TWEISEESPARHSLVCRG  
LLSLLAEGSAKATDSESTDAILGAALDHALKRKL CIVGDSVVAIHRIGAASVIKIVEVKEKVVKVA A

>Physcomitrella2 186171

MATKSSISHILGNTPDDGRLKIAKTKI ICTLGPKSREVPVLEKLLRAGMNVARFNFSHGTHEYHQYTLDSL RQAC  
INTQTMCAVLLDTKGPEIRTNGLASGKPIQLKRGEIILITTDYSHLG DENMIAMSYQRLPVDVKPGNTILCSDGT  
IALSVLECDAEKGVVCRCENTAMLGEKKNVNLPGVIVDLPTITPKDRDDILNWGVPNKIDFIAASFVRKGS DLI  
QIKQLLGEASKNIHII SKVENQEGLVNFDDILRESDGVMVARGDLGMEIPTEKIFLAQKMMIYKCSAGKPVVTA  
TQMLESMIKSPRPTRAEATDVANAVLDGTDVMSGETANGLYPELAVAVMSQICQEAESLDYSAIFKETMKS V  
PLPMSPLESLASSAVRTANKVCASLIVLTRGGTTARLVAKYRCPVPILSVAVPVMTTDSL TWTCSEESPAHHS L  
VVRGLIPLLAEGSARST DSESTEVI LNAAIKYALRRRLCLVGD SIVALHRIGVGNVIKIMEVKDVKY YARMSTI H  
R

>Physcomitrella3 172921

MATKTDIAHILGLDANEDDGLKISKTKIVCTLGPKSREVVHLEKLLRAGMNVARFNFSHGTHEYHQYTLDSL RQ  
AMANTQTMCAVLLDTKGPEIRTGSLAAGKPIQLKRNEIWIITTDYSHLG DENMIAMSYAKLAVDLEPGNTILCSD  
GTITMTVL DCHPEKGMVKARCENTAMLGEKKNVNLPGVIVDLPTITQKIDDIMQWGVPNKIDFIAASFVRKGS D  
VVTIKKLLGEASDSIHVISKVENQEGLVNFDDILKETDGMVARGDLGMEIPTEKIFLAQKMMIYKCSAGKPVV  
TATQMLESMIKSPRPTRAEATDVANAVLDGTDVMSGETANGSYPELAVAVMSQICQEAESAALDYSAIFKEIMK  
SVPLPMSPLESLASSAVRTANKVRASLIVLTRGGSTARLVAKYRCPVPILSVAVPVMTTD GLEWTF SAPSPAHH  
SLCCRGLIPLLAEGSAKATDSESTEI LNAAVKYALKRKLCLVSDS VVALHRIGVASVIKIEVKDLASS

>Physcomitrella4 109480

MQATQLLLEEP IRLASILEPSSPTAFSALTKIIGTLGPQSRDVETIEALLKAGMSVARFDFSWGNDAYHQETLEN  
LKKAVRNTRRLCAVMLDTIGPELCLVNKEEHVIELQEGATVVLTADETR GASA EVLPLNYDGLASAVTKGDTIFL  
GQYLFTGSETTSVWLEVVETQGKDVVCTVKNTATLTGSLFTAHSQVRIELPTLSEADLKT MATWGVKNQIDFVS  
LSYTRHPDDVRACREYLDKLGDLRQTQIFAKIENYEGLAHFDEILEEADGIILSRGNLIGIDLPEKVFVLFQKVAL  
QKCNAAGKASIVTRVSDMVDSRPRTRAEATDVANAVLDGTDGIMLGAETLRGLYPVETITTTIRKICAEAEKVFN  
QAVYFKRTIKAVREPMQHLESIASSAVRAASKVRASVIVVFTSSGRCARLI AKYRPTMPVLCVVI PRLTTNHLKW  
SFTGAFQARQCLAVRGLFPMLADPRHSSDSASTTNE SILKVALDHGKAAGIVKAHDRIVVCQKVGDS SVVKI IEL  
D

>Physcomitrella5 159402

MQATQLLLEEP IRLASILEPSSPTAFSALTKIIGTLGPQSRDVETIEALLKAGMSVARFDFSWGNDAYHQETLEN  
LKKAVRNTRRLCAVMLDTIGPELCLVNKEEHVIELQEGATVVLTADETR GASA EVLPLNYDGLASAVTKGDTIFL  
GQYLFTGSETTSVWLEVVETQGKDVVCTVKNTATLTGSLFTAHSQVRIELPTLSEADLKT MATWGVKNQIDFVS  
LSYTRHPDDVRACREYLDKLGDLRQTQIFAKIENYEGLAHFDEILEEADGIILSRGNLIGIDLPEKVFVLFQKVAL  
QKCNAAGKASIVTRVSDMVDSRPRTRAEATDVANAVLDGTDGIMLGAETLRGLYPVETITTTIRKICAEAEKVFN  
QAVYFKRTIKAVREPMQHLESIASSAVRAASKVRASVIVVFTSSGRCARLI AKYRPTMPVLCVVI PRLTTNHLKW  
SFTGAFQARQCLAVRGLFPMLADPRHSSDSASTTNE SILKVALDHGKAAGIVKAHDRIVVCQKVGDS SVVKI IEL  
D

>Physcomitrella6 219237

MQATQLLLEEP IRLASILEPSSPTAFSALTKIIGTLGPQSRDVETIEALLKAGMTVARFDFSWGDDAYHQETLEN  
LKKAVRNTRRLCAVMLDTIGPELCLVNSDEGVIELVEGASVLLAADRTVKASATVPLNYDGLASAVKKGDTIFV  
GQYLFTGSETTSVWLEVVETKKGKDVVCTVKNTATLAGNMFTAHSQVRIIDLPTLSEADLKT MATWGVKNQIDFVS  
LSYTRHADDVRACREHLSKLGDLRQTQIFAKIENYEGLAHFDDILKEADGIILSRGNLIGIDLPEKVFVLFQKVAL  
QKCNAAGKASIVTRVSDMVDSRPRTRAEATDVANAVLDGTDGIMLGAETLRGLYPEESISTVHKICAEAEKVFN  
QAVYFKRTIKGVKEPMQHLESIASSAVRAATKVRASVIVVFTSSGRCARLI AKYRPTMPVLCVVI PRLTTNHLKW  
SFTGAFQARQCLAVRGLFPMLADPRHSSDSASTTNE SILKVALDHGKAAGIVKAHDRIVVCQKVGDS SVVKI IEL  
D

>Physcomitrella7 169342

MAASTLAHCACHGSCVAAASDDAVVLDRFQGLRKPAFISSRRGSVSWRGATKPNLSWDGARVEVPVRATALRPGR  
YVKEQGGAI VPI SPEDGRINFLEDEVKVRSEELPNE SRGGMWVKPSFQRKTKIVCTIGPNTKEMIWKLA EAG  
MNVARLNMSHGHDHASHKVIDLVREYNKEANANVIALMLDTKGPEVRSGLDLPQPI MLKKGDPFTFTIKRGVGTDT  
CVSVNYDDFVNDVESGDTLLIDGGMMSLEVKSKTHEEVLCEVVDGGELKSRRLNVRGKSATLPSITEKDWEDIK  
FGVENKVD FYALS FVKDAQVVHELKSF LKGSADIHVIVKIESADSI PNLS ILDAADGAMVARGDLGAE LPIEE  
VPLLQGEIIRSCRAMGKPVIVATNMLESMTHTPTPTRA EVSDIAI AVREGADAVMLSGETAHGKYPLKAVRMHT  
VAMRTEATMPEEEAPSNLGRAFKTHMSEMFAFHATLMSNTLGTSICVFTRSGFMALLLSHYRPA GTIFAFTNDKK  
VQSRLALYHGVRTLHINFNTDAEETFVYALSILQKKGMVQDGEEVALVQSGRQPIWRSEYTHHIQVRKVRA

>Physcomitrella8 108784

MASMLINSSHFATR AVSGGEVAFLDRFQGLRQKSFSGTTKSGLRVGRKKGKSSEAVRVAVLVRATSYRPGRYVKEK  
GGSII PVSPEDGRINFLEDEVKLR LRFQGLPDES RVGMWVKPSFQRKTKIVCTIGPNTKEMIWKLA EAGMNVAR  
LNMSHGHDHASHKEVIDLVREFNKEAHANVIALMLDTKGPEVRSGLDLPQPI MLKKGDPFTFTIKRGVGTDT CVSVN  
YDDFVTDVEIGDTLLIDGGMMSLEVKGKTHEEVYCEVVDGGELKSRRLNVRGKSATLPSITEKDWEDIKFGVEN  
KVDFYALS FVKDAQVVHELKSF LKEKSADIHVIVKIESADSI PNLS ILDAADGAMVARGDLGAE LPIEEVPLLQ  
GEIIRSCRAMGKPVIVATNMLESMTHTPTPTRA EVSDIAI AVREGADAIMLSGETAHGKYPLKAVRMHTVAMRT  
EATMPEEEAPANLGRAFKTHMSEMFAFHATLMSNTLGTSILVFTRTGFMALLLSHYRPGVTIFAFTNDKRVQSRL  
ALYHGVRAIHIKFTNDAEETFNYALSILQKKGMVQDGEEVALVQSGKQPIWRSEYSHHIQVRKVRA

>Physcomitrella9 128385

MDVDSVTEAE LKENGFRSTRRTKL VCTIGPASCAP EQLEALAMGGMNVARLN MCHGTREWHTQVIRNVRSLNSEK  
GYSVAIMMDTEGSEIHM GDFNGAPSVKAEDGEEWIFTVRKLDLSPERTTVVNYDGF AEDVKIGDELLVDGGMVRF  
EVIEKIGP DVKCKCTDPGLLLPRANLTFWREGRLVRERNAMLPTISSKDWIDIDFGIAEGVDFIAISFVK TSEVI  
KHLKSYINARAPNGSIGVF AKIESSDSLKNLEDI IRVSDGAMVARGDLGAQI PLEQVPSVQQGIVNVCRELNKPV  
IVASQLLES MIEYPTPTRA EVADVSEAVRQRADALMLS GESAMGLFPEKALS VLR TVSLRMEEWCRENKAHASDR  
LPELSSALHDRI SENICNSASQMANRLGVDAIFVYTRRGYMASLLSRSRPDCPIFAFTDTQAVRQRLNLQWGLIP  
FRLDLSGDMESNLRRTFALLKARGMMKGD LIVA VSDISTSDVMQSIQVRRIP

>Physcomitrella10 148824

MEVDAVTEAE LKENGFRSTRRTKL VCTIGPATCAPEQLEALAMGGMNVARLN MCHGTRDWHKQVIRNVRSLNSEK  
GYSVAIMMDTEGSEIHM GDFNGAPSVKAEDGQEWIFTVRTLES LPERTTVVNYDGF AEDVRVGD ELLVDGGMVRF  
EVIEKIGP DVKCKCTDPGLLLPRANLTMWREGRLVRDLNAMLPTISSKDWIDIDFGIAEGVDFIAVSFVK TSEVI  
KHLKSYINARAPNDSIGVF AKIESSDSLKNVEDI IRVSDGAMVARGDLGAQI PLEQVPSVQQGIVNLCRELNKPV

IVASQLLESMIEYPTPTRAEVADVSEAVRQRADALMLSGESAMGLFPEKALSVLRTVSLRMEEWCRENKQHASDR  
LPELSSALNDRISESICSSAAQMANRLGADAI FVYTRRGYMASLLSRARPDCPIFAFTDTKSMRQRLNLQWGLIP  
FRLDFSGDMESNLRRTFALLKARGMMKGD LIVA VSDISTSDFMQSIQVRRIP

>Physcomitrella1 198597

MRPQVQVPQRKSGLVYAKAEAVLGLEENKDGAVSVNGAS PANPGVEGAQSQSMEIDLVTAEELKENGFRSTRRTK  
LICTIGPATCAPEQLEALAI GGMNVARLNMCHGTREWHTEVICNVRRLNSEKGYSAIMMDTEGSEIHMGD FNGA  
PSVKAEDGEEWIFTVRKFGTLPEFTTIVNYDGF AEDVKVGDDELVDGGMVRFVIEKVGPDVKCKCTDPGLLLPR  
ANLTFWREGRLVRERNAMLPTISSKDWIDIDFGIAEGVDFIAISFVKTSEVIKHLKSYIQARSPNGSIGVFAKIE  
SSDSLKNLEDIIRVSDGAMVARGDLGAQI PLEQVPSVQQAVVNLCRELNKPVIVASQLLESMIEFPTPTRAEVAD  
VSEAVRQRADALMLSGESAMGLFPEKALSVLRTVSLRMESWCRENKQHASDR LPELSPALDDRI SENICNSASQM  
ANRLGVDAIFVYTRRGYMASLLSRCRPDCPIFAFTDTKMVRQRLNLQWGLIPFRLDFSGDMESNLRRTFALLKAR  
GMMKKGDLVAVSDISEADMLQSIQVRRIP

>Physcomitrella12 147118

MNLFLGCGRHY YASERNLLHYMGFRSLDVANLQEGGLASSGLSGLEGCEAHTLASINTLGTILFSLTNSQNNCSW  
TSATDVVLNGTEHISYEAGNFMLSKHAEALLGSSPPERNTVIMVTL PSEAAEDDKLIRHLLLSGMNVARINCAHD  
SPEVWKKMVQKVRFFAELLEMPCRVSFDLTRPKLRTGPMQPGPSVLKIKPTKDSLGHVVAPACVWIAEEGVRPSG  
QRIPDVCVPIIPSPGWTKKI QSGDAIKFKDARGRSREL RVMEKGSDFSRAGIFAECRAVSYIEPGCALTVLGYDG  
QRLNLNVGQLPEVEQA ILLRPGDKLLLRDHLVGLSPAQVDKAGKVVVPASVTCTLDKVFVDVAKLGGPVKFDDGKI  
GGVIGSVSPSEICVTITEAGGHKGRKLKGEKAINFPESDLSLNGLTVKDAEDLDFV VANADMLALS FVNGPADVR  
ALQDELARRGADEIGIVVKIETELGFGQSLPSILLQTMVMTMNPVGMVARGDMAVECGWQRLAEIQDQILLCEAA  
HVPTI WATQVLEELAKSGLPSRAEITDAASGSRAECVMLNKGPYILQAVASLDDILRREASRRRKNRWRMHPLQN  
LGNLDM

>poplar1 fgenes4\_pm.C\_LG\_I000007

MRPKTKIVCTLGPASRSVPMIEKLLRAGMNVARFNFSHGSHEYHQETLDNLKAAMVNTGILCAVMLDTKGPEIRT  
GFLKDGKPIQLKLGQEITISTDYS LKGDENMICMSYKKLAVDVKPGM VILCADGTISFTALSCDTKAGLVRRCRCE  
NSATLGERKNNVNLPGVIVDLPTL TEKDKEDILAWGVPNKIDMIALSFVRKGS DLVEVRKLLGESHKNILLMSKVE  
NQEGVANFDDILANS DAFMVARGDLGMEIPIEKI FLAQKVM IYKCNIQGKPVVTATQML ESMIKSPRPTRAEATD  
VANAVLDGSDCVMLSGETAAGAYPELAVRTMAKICIEAENTLDYGDVFKRTMEHSPVPMSPLESLASSAVRTANS  
VKASLILVLRGGSTAKLVAKYRPGIPILSVVVPEIQTDSFDWSCSDEAPARHSLIFRGLVPVLYAGSAKASNAE  
TTEEALDFSLQHAKGKGLCRTGDPVVALHRVGTASVIKIITVK

>poplar2 estExt\_fgenes4\_pg.C\_LG\_III1798

MEKRPNTKIVCTLGPASRSVPVIEKLLKAGMNVARFNFSHGS HDYHQETLDNLMAAMVNTGILCAVMLDTKGPEI  
RTGFLKDGKPIQLNQGQEITISTDYS LKGDENMICMSYKKLAEDVQPGM VILCADGTLSFTVLSCDTEAGLVRRCR  
CENSAVLGERKNNVNLPGVIVDLPTL TEKDKEDILAWGVPNKIDMIALSFVRKGS DLVEVRKLLGKHAKNILLMSK  
VENQEGVANFDDILANS DAFMVARGDLGMEIPIEKI FLAQKVM IYKCNIQGKPVVTATQML ESMIKAPRPTRAEA  
TDVANAVLDGTD CVMLSGETAAGAYPELAVQTM AKICVEAEESTLDYGDVFKRTTKHSPVPMSPLESLASSAVRTA  
NSVKASLILVLRGGSTAKLVAKYRPGMPILSVVVPEIQTDSFDWSCSDEAPARHSLIFRGLVPVLYAGSAKASH  
AETTEEALDFALQHAHGKGLCRTGDPVVALHRVGTASVIKIINVK

>poplar3 eugene3.00080009

MANIDIEGLLKEHQDDEEGRVPRTKIVCTLGPSSRSVPMLEKLLRAGMNVARFNFSHGTHEYHQETLNNLRIAMQ  
NTNILAAVMLDTKGPEIRTGFLKDG NPIQLKEGQEITITTDYS IKGDTMISMSYKKLPVDIKPRNTILCADGTI  
TLTVLSCDPKAGTVRCRCENTAMLGERKNNVNLPGVVLDLPTLTDKDKEDILGWGVPNNIDMIALSFVRKGS DLVN  
VRKVLGPHAKHIQLMSKVENQEGVNFDEILRETDSFMVARGDLGMEI PVEKIFLAQKMMIYKCNIVGKPVVTAT  
QML ESMIKSPRPTRAEATDVANAVLDGTD CVMLSGESAAGAYPELAVKTMRRICIEAESL DYA AIFKEMIRSTP  
LPMSPLESLASSAVRTANKAKAKLIVVLTRGGTTAKLVAKYRPAVPILSVVVVPLT TDSFDWTC SDETPARHSLI  
YRGLIPLLAEGSAKATDAESTEVI LEAALKSATKRG LCKPGDAVVALHRIGAASVIKICLVK

>poplar4 grail3.0106001101

MANIDIEGLLKEHL DDEEGRVPKTKIVCTLGPASRSVPMLEKLLRAGMNVARFNFSHGTHEYHQETLNNLRIAMQ  
NTNILSAVMLDTKGPEIRTGFLKDGKPIQLKEGQEITITTDYS IKGDTDTISMSYKKLPVDVKPGNTILCADGTI  
TLTVLSCDPQAGTVRCRCENTAVLGERKNNVNLPGVVLDLPTL TEKDEEDILEWGVPNNIDMIALSFVRKGS DLVH  
VRKVLGPHAKHIQLMSKVENQEGVIN FDEILRETDSFMVARGDLGMEI PVEKIFLAQKMMIYKCNIVGKPVVTAT  
QML ESMIKSPRPTRAEATDVANAVLDGTD CVMLSGESAAGAYPELAVKIMRRICIEAESL DYGAI FKMIRSI P  
LPMSPLESLASSAVRTANKAKAKLIVVLTRGGTTAKLVAKYRPAVPILSVVVVPLT TDSFDWAC SDETPARHSLI  
YRGLIPLLAEGSAKATDAESTEVI LEAALKSATARG LCKPGDAVVALHRIGAASVIKICIVK

>poplar5 fgenes4\_pm.C\_LG\_XIII000262

MVGEDTRNRKTKIVCTLGPQSRVEMTERLLRAGMNVARFNFSHGTHAYHQETLDNLGTAMNNTGILCAVMLDTK  
GPEIRTGFLKDGKPVQLKQGQEILISTDYS LKGDENMICMSYKKLAEDVQPGSVILCSDGTISLTVLACDKEAGL

IRRCENSAVLGEKKNVNLPGVVVDLPTLTEKDKEDILKWGVPNKIDIIALSFVRKGSDDLTEVRKLLGDDGKNIL  
LMSKVENQEGVANFDDILANSDAFMVARGDLGMEIPIEKIFLAQKVMHKANIQGKPVVATATQMLESMIKSPRPT  
RAEATDVANAVLDGTDCVMLSGETAAGAYPELAVQTMSTRICMEAEENFIDYGHLFKAIMVTAPMPMPLESMASSA  
VRTANTIKAAFILVLTGKGTAKLVSKYRPSMILSMIVPEIRTDFFEWSCSDEAPARHSLIYRGLMPVLSSVSG  
KVYHSESTEETIEQAFHYAKIKGLCKPGDSVVALHKIGAA SVIKILQVQQ

>poplar6 fgenesh4\_pg.C\_LG\_XIX000384

MVGEDKRTRKTKIVCTLG PQSRSVEMIERLLRAGMNVARFNFSHGTHAYHQETLDNLR TAMNNTGILCAVMLDTK  
GPEIRTGFLKDGKPVQLKQGM EILITTDYSLKGDENMICMSYMKLAEDVQPGSVILCSDGTISLTVLACDKDSGL  
VRCRCENSAVLGEKKNVNLPGVVVDLPTLTEKDKEDILKWGVPNKIDMIALSFVRKGSDDLVEVRKLLGNDGKNIL  
LMSKVENQEGVANFDDILANSDAFMVARGDLGMEIPIEKIFLAQKVMINKANIKGKPVVATATQMLESMIKSPRPT  
RAEATDVANAVLDGTDCVMLSGETAAGAYPELTVQTMSTRICMEAEENFIDYGHLFKTIMATAPMPMPLESMASSA  
VKTANTIKAAFILVLTGKGTAKLVSKYRPSMILSMIVPEIRTD SFEFGSCSDEAPARHSLIYRGLMPVMTSISG  
KVYHSESAEETIEMAFQYAKMKGLCKPGDSVVALHKIGTASVIKILRVQ

>poplar7 estExt\_fgenesh4\_pm.C\_LG\_VIII0091

MNPHLNLEENMKLASVLEPSKPSFFPAMTKIVGTLGPKSRSVEIISNCLKAGMSVARFDFSWGDTDYHQETLDNL  
KIAVKSTKKLKCGVMLD TVGPELQVINKKENPISLQEDSFVVLT PDLKEATSCLLPINFTGLSSAVKKGDTIFIG  
QYLFTGNETTSVWLEVTEVNGEDVVC LVKNSATLSGLLYTLHVSQIHIINLPTLTDKDK EVISSWGVRRNIDILSL  
SYTRHAEDVRHAREFLSKLGDLSQTQIFAKIENVEGLAHFDEILQEADGVILSRGNL GIDLPPPEKVFLFQKTAVF  
KCNMAGKPAVVTRVVD SMTENLRPTRA EATDVANAVLDGSDA ILLGAETLRGLYPVETISTVGRICAEAEKVFN Y  
DLYYKRAVKYAGDSMSHLESITSTAVRAAIKV KASVILCFTSTGRAARFI AKYKPTTPV ISVVI PRLKTNQLRWT  
FTGA FEARQSLIVRGIFPMLADARHQAE SSNSTNESVLKVALDHGKAHGFIKPHDRVVVCQKLGDAYVVKILELE  
D

>poplar8 gw1.XII.1350.1

SVVEKLVAVYLVHVLASEQWNASQLKLC HRNYLDSATNLIHYLALRCLDIQQLKEDLTLGLMNLETINLHVLSL  
NASIRLLEALKSNSLNPNDSVSEGI FTEKRLDPONDGKFTIQAMRKKASSNSEFLLGRLQDGRTHIMVTVGQEA  
TENETFITDLIKAGTSIIRINCAHGNPSI WSEI IKRVKESSQMLEKPCRILMDLAGPKLR TGKLSGSPVVKISP  
KKNASGNVVFPAQVWLSHREAGTP PTHLSPDAVLFVDDQQFLSELEIGD TIRFSDARGKKRLLRISKKIHVFSGT  
GCVAECTRTAYVQSGTELHLKGGKRRS QLGKVVDVPAIEPYIRLRVGDLLVIRS CSSELDEMHVSMGTHKITC  
SSGYLFDSVTPGEP IAFDDGKIWGVIKGTDISEIIVSITHASPKGSKLGS DKSINIPESNIRFEGLTSKDLMDLE  
FVAAHADIVGVSFVRDIHDIVVLRQ ELEKRKLQNLGVILKIETKSGFENLPLMLLEAMKSSNPLGVM IARGDLAV  
ECGWEMLADMQEEIISL CGAAHIPVVWATQVLES LKSGVPTRAEITDAAHGRRVKCVMLNKGKHIVKAVSTLDN  
ILHKS SAERKVD

>poplar9 estExt\_fgenesh4\_pm.C\_LG\_X0935

MNPHLNLEENMRLASVLEPSKPSFFPARTKIVGTLG PQSRTVEIITNCLKAGMSVAQFDFSWGDT EYHQETLDNL  
KAAVKSTKKLKCGVMLD TVGPELQVINKTERPISLQEDSFVVLT PDDQKEATSSLLP INFTGLSSAVKGTDTIFIG  
QYLFTGSETTSVWLEVTEVNGEDVVC LVKNSATLSGPLYTLHVSQIHIIDLPTLTDKDK EVISSWGVRRNIDILSL  
SYTRHAEDVRHAREFLSKLGDLYQTQIFAKIENVEGLAHFDEILEEADGIILSRGNL GIDLPPPEKVFMFQKTAVF  
KCNMAGKPAVVTRVVD SMTENLRPTRA EATDVANAVLDGSDA ILLGAETLRGLYPVETISTVVKICAEAEKVFN Y  
DLYYKRTVKYAGDAMSHLESITSTAVRAAIKV KASVILCFTSTGRAARLI AKYKPI TPV ISVVI PRVKTDQLRWT  
FTGA FEARQSLIVRGVFPMLADPRHQAE STNATNESVLKVALDHGKAAGFIKPHDRVVVCQKLGDSYVVKILELE  
D

>poplar10 eugene3.00120107

MAQVVATTRSIHSSILSSPSSGSLQDRVDKLLK PSTLSSKFLSSHDKKKIISVSSHRNTHIVAAAVKRS AEPEV  
IPVSPEDVPKREEQFVQLEQLGDTTAAVGMWTKPTVRRKTKIVCTIGPSTNTKEMIWKLA EAGMNVARMNMSHGD  
HASHQKVIDLVKEYNAQAKDNVIAIMLDTKGPEVRSGLDLPQPIMLS PGQEFFT IRRGVGTSDCVSVNYDDFVSD  
VEAGDMLLDVGGMMSLLVKS KTEDSVKCEVVDGGELKSRRLNVRGKSATLPSITDKDWD DIKFGVENKVDFYAV  
SFVKDAQVVHELKNYLQSCGADIHVIVKIESADSI PNLSIITASDGAMVARGDLGAELPIEEVPLLQEEIRLC  
RSMGKAVIVATNMLES MIVHPTPTRA EAVSDIAI AVREGADAVMLSGETAHGKFP LKAVKVMHTVSLRTEATIAGG  
EMPSNLGQAFKNHTSEM FAYHATMMSNTLGTSIVVFTRTG FMSILLSHYRPSGTVFAFTNEKRIQQRLALYQGV C  
PIYMQFSDDAEETFANALS VLKNQGMVKEGEEVALVQSGRQPIWR FQSTHNIQVRKV

>poplar11 gw1.IX.2629.1

DVVAERELREKGFGLMRKTKLVCTIGPACCSLEDLERLAMRGMNVARLNMCHNTREWHRDVIRKIKKLNEEK GFS  
VSV MIDTEGSLIHVVHDHGV PSSLKAEEGSVVVF TAQKFEGSRPFTVQANYQGFSEGI MVGDELVIDGGMARFEVV  
EKMGNDLHCKCTDPGLFLPRAKLSFWRDGKLSYHGLPTLSPKDWEDVDFGISEGVDFIAMS FVNDADSVKDLKNY  
LFAKTSKSI RVLAKIETLES LQKLEEIVEASDGIMVARGDLGVEVPLEQIPTVQEDI TRLCRQMNKPV IASQLL  
ESMVEYPTPTRA EAVADVSEAVRQYADALMLS GESAIGLHGQKALSVLQMASSRMELWSREENRQSALHNCQLGGS

LSDCIAEEICSCAVQMANNLGVDAIFVYTKHGEMASLLSRNRPYPPIFAFTSDSDARMALNLQWGVIPLLVLDLAD  
DMEANISKTIDL MRANGMVKEGEAVLVVSDL

>poplar12 eugene3.00280289

MHSNHLLEEPIRMASILEPSKSSFFPAMTKIVGTGLGPKSRSVEVIVSGCLKAGMSVARFDFSWGNPEYHQGTLEN  
LKAAVKTTKKLCAVMLDVTGPELQVNVKSGNPI SLLADGFVILTDPDQEQEASSKVLPI NFDGLSKAVKHGDTIFV  
GQYLFTGSETTSVWLEVEVKGNDVVCVIKNSATLAGSLFTLHASQIRIELPTLSDKDKEVISTWGVQNKIDFLS  
LSYTRHAEDVRNAREYLSKLGDLYQTQIFAKIENIEGLTHFDEILQEADGIILSRGNLIGIDLPEKVFVLFQKAAL  
YKCNMAGKPAVVTRVVDSDMTDNLRPTRAEEATDVANAVLDGSDAILLGAETLRGLYPIETISTVKGKICAEAEKVFN  
QDLYFKKTVKYVGEPMTHLESIASSAVRAAIKVKSSVVICFTSSGRAARLIAKYRPTMPVLSVVI PRLKTNQLKW  
SFGAFAEARQSLIVRGLFPMLADPRHPAESTSATNESILKVALDHGKASGVKSHDRVVICQKVG DASVVKI IEL  
ED

>poplar13 gw1.29.22.1

LSSSSKLSDFVFMLESRLRKRCCFFQNPNTVRS MKVREQNQTANLVSSNELLTNNQTLVKEKTDPI SRRKTKIVCT  
IGPSTSSREMIWKLAEAGMNVARLNMSHGDHASKITIDL VKEYNAQSDDNVIAIMLDTKGPEVRS G DVPQPIIL  
EEGREFNFTIKRGVSS EDTVSVNYDDFINDVEVGDMLVDGGMMSLAVKSKTNDLVKCVVVDGGELKSRRLNVR  
GKSATLPSITDKDWEDIKFGVDNQVDFYAVSFVKDAEVVHELKDY LKSCNADIHVIVKIESADSI PNLHSIISAS  
DGAMVARGDLGAELPIEEVPLLQEDI IRRCHSMQKPVIVATNMLES MIDHPTPTRAEVSDIAIAVREGADAVMLS  
GETAHGKYPLKAVKVMHTVALRTESSLPVNTTAPTHNVYQSHMGEMFAFHATIMANTLNTPI IVFTRTGSMAIHL  
SHFRPSSTIFAFTNEERIKQRLVLYQGVKPIYMQFSDDAEETF SRALKLLLNKGQLMEGQHVTLVQSGAQPIWRR  
KSTHHIQVCKVQS

>poplar14 eugene3.01180041

MATINNMSTRMCRDHRILSSSGLSDVFLVSRFRKRCFFQNSKFTVRS MKANEQNQTRKLASSNGPLTASEKVS  
SPFELLTNNQTLGKENINPIARRKTKIVCTIGPSTSSREMIWKLAEAGMNVARLNMSHGDHSSHKKTIDL VKEYN  
AQSDDNVIAIMLDTKGPEVRS G DVPQPIILKEGQEFNFTIKRGVSTEDTVSVNYDDFINDVEAGDMLLVDGGMMS  
LSVKSKTKDAVKCVVVDGGELKSRRLNVRGKSATLPSITDKDWEDIKFGVDNQVDFYAVSFVKDAEVVHELKDY  
LTSCNADIHVIVKIESADSI PNLQSIISASDGAMVARGDLGAELPIEDVPLLQEDI IRRCHNMQKPVTVATNMLE  
SMIDHPTPTRAEVSDIAIAVREGADAVMLSGETAHGKYPLKAVKVMHTVALRTESSLPFNSTAPTHNVYKSHMGE  
MFAFHATIMANTLNTPI IVFTRTGSMAILLSHYRPASTIFAFTNEERIKQRLALYQGAMP IYMQFSDDAEETFAR  
ALKLLLSKGLLMEGQNVTLVQSGAQPIWRRESTHHIQVRKVQA

>poplar15 estExt\_fgenesh4\_pm.C\_LG\_VIII0682

MSQSLHFFTPSNLTFKQSLPKPSCNRRFPVTTLS PKLISIKASTSADPNSSSTPPQVLISDNGTGAGEILSSTP  
QDYDTPPSQSFLSDSSSIDVDAATEVELKENGFRSTRRTKLVCTIGPATCGFEELQALAVGGMNVARINMCHGTR  
EWHKRVI ERVRLNEEKGF AVAIMMDTEGSEIHMGLDGGASSAKAEDGEI WTFVRAFDLPRPERTINVNYDGF A  
EDVKVGDELLVDGGMVRFEVIEKIGPDVKCRCTDPGLMLPRANLTFWRDGLVRE RNAMLPTISSKDWLDIDFGI  
AEGVDFIAISFVKSAEVINHLKSYIAARSRSDIAVIAKIESIDSLRNLEEIIQASDGAMVARGDLGAQI PLEQV  
PSAQQKIVQICRQLNKPVIVASQLLES MIEYPTPTRAEVADVSEAVRQRADALMLSGESAMGQY PDKALAVLRSV  
SVRIEKWWREKRYEAMELPAVGSSFS SDSISEEICSSAAKMANNLGV DALFVYTKTGHMASLLSRCPDCPIFAF  
TSTKSVRRRLNLQWGLIPFRVVSFSDDMESNLNKTFSLLKARGMIKSGDLVIAVSDMLQSIQVMNV P

>poplar16 estExt\_fgenesh4\_pg.C\_LG\_X0733

MSRSLHIFTPSNLTFPKQPYPKPSSNRRFPATTFS PKLISIKASTSSDPNSSSTSPQVLISNNGTGASGILSSTPQ  
DYDTPPSQSIISDSSSIEVDAVTEVELKENGFRSTRRTKLVCTIGPATCGFEELALAVGGMNVARINMCHGTRE  
WHRRVIERVRLNEEKGF AVAIMMDTEGSEIHMGLDGGASSAKAEDGEI WTFVRAFDLPRPERTINVNYDGF A  
DVKVGDELLVDGGMVRFEVMEKIGPDVKCRCTDPGLMLPRANLTFWRDGLVRE RNAMLPTISSKDWLDIDFGI  
EGVDFIAISFVKSAEVITHLKS YIAARSRSDIAVIAKIESIDSLKNLEEIIQASDGAMVARGDLGAQI PLEQV  
SAQQNIVQICRQLNKPVIVASQLLES MIEYPTPTRAEVADVSEAVRQRADALMLSGESAMGQY PEKALAVLRSV  
VRIEKWWREKCHEAMEL PVVGSSFS SDSISEEICSAAKMANNLGV DALFVYTKTGHMASLLSRCPDCPIFAF  
STTSVRRRLNLQWGLIPFRVVSFSDDMEGNLNKTFSLLKARGMIKSGDLVIAVSDILQSIQVLI V P

>poplar17 gw1.I.4193.1

DVVAERELREKGF LGVRKTKLVCTIGPACCSLEDLERLAMGGMNVARLN MCHNTREWHRDVIRKVKKLNEEKGF F  
VSMIDTEGSLIHVVVDHGAPSSIKAEEGSVVWFTATKFEGRPFTVQANYEGFSEGIMVGD ELVIDGGMAKFEV V  
ERMAGNDRCKCTDPGLFLPRAKLSFWRDGKLSYHGLPTLS IKDWADVDFGVSEGVDFIALSFVNDANSVKNLKNY  
LSAKSSKSI RVLAKIETLES LQKLEEIVEASDGMVARGDLGVEVPLELIP TVQEDVTRLCRQLNKPVI IASQLL  
ESMVECTPTRAEVADVSEAVRQYADALMLSGESAI GLHGQKALSVLQMVSSRMELWSHEENRQ GALHNSQLGDT  
LSDCIAEEICNCAVQMANNLGVDAIFVYTKHGEMASLLSRNRPYPPIFAFTSDNNARMALNLQWGVIPLLVLDLSD  
DMEANISKTIDLIRTKGMIKEGDAVLLVSDL

>potatoPKCYT1 S53332



MANIDIAGIMKDLPNDRIPKTKIVCTLGPSRTVPMLEKLLRAGMNVARFNFSHGTHEYHQETLDNLKIAMQNT  
QILCAVMLDTKGPEIRTGFLTDGKPIQLKEGQEITVSTDYTIKNEEMISMSYKKLVMDLKPNGTILCADGTITL  
TVLSCDPPSGTVRCRCENTATLGERKVNLPVGVVDLPTLTKDKEDI LEWGVPNNDMIALSFVRKGSGLVNVN  
KVLGPHAKRIQLMSKVENQEGVINFEILRETDSFMVARGDLGMEIPEKIFLAQKMMIYKCNLAGKAVVTATQM  
LESMIKSPAPTRAEATDVANAVLDGTDVMSLGSAGAYPELAVKIMSRIEAESSLNEAIFKEMIRCTPLP  
MSPLESASSAVRTANKARAKLIVVLTRGGSTAKLVAKYRPAVPILSVVVPVLTDSFDWSISDETPARHSLVYR  
GLIPLLEGESAKATDSESTEVEILEAALKSAVTRGLCKPGDAVVALHRIGSASVIKICVVK

>potatoPKCYT2 TC134535

MAIENSNNVCRPKTKIVCTLGPPASRSVPMVEKLLRAGMNVARFNFSHGSHDYHQETIDNLRQAMENTGILCAVML  
DTKGPEIRTGFLKDGKPVQLKQGEITVSTDYSIKDESTICMSYKKLAEDVKPQSVILCADGTITFTVLSCDKE  
KGLVRCRCENTAVLGERKVNLPGVIVDLPTLTDKDKDDILNWGVPNHIDMIALSFVRKGSGLVEVRKLLGEHAK  
NILLMSKVENQEGVANFDDILANSDAFMVARGDLGMEIPIEKIFLAQKMMIYKCNIQGKPVVTATQML  
RPTRAEATDVANAVLDGTDVMSLGSAGAYPD LAVGTMARICIEAESTIDYPDVFKRIMANAPVPMSPLES  
SSAVRTANSAKAALILVLTRGGSTAKLVAKYRPGMPILSVVVPVPEIKTDSFDWTCSDSPARHSLIFRGLVPV  
LHAGSARASHEESTEEALYFALQHAKTGKLCKEGDSVVALHRVGTASVIKIVTVK

>potatoPKCYT3 TC141201

MHSNHLLEEPIRMASILEPSKPNFFPAMTKIVGTLGPKSRSVEAISACLKAGMSVARFDFSWGDSEYHQETLEN  
LKSAIKATKKLCAVMLDTVGAEQVVKRETTISLTEDAVITLTPHQGEASNEVLPINFGGLAKAVKKGDTIFV  
GQYLFTGSETTSVWLEVDQVNGDDVICVVKNSATLAGSMFTLHASQVHIDMPTLTDKDKKEVISTWGVQNKIDFIS  
LSYTRHAEDVREAREFLSKLGDLSQTQIFAKIENVEGLTHFDEILKEADGIILSRGNLIGIDLPEKVFVLFQKAAV  
HRCNMAGKPAVVTRVDSMTDNLRPTRAEATDVANAVLDGTDAILLGAETLRGLYPVETISTVGKICAEAGKVF  
QDLYFKKTVKVFGEPMTHLEAIASSAVRAAIKVKASVICFTSSGRAARLIAKYRPTMPVLSVVI  
PRLKTNQLKWSFTGAFEARQSLIVRGLFPLADPRHPAESNNATNESVLKVALDHGKASGVIKSHDRVVVCQKVG  
DASVVKIIELED

>potatoPKCYT4 TC118783

MHSNHLLEEPIRMASILEPSKAGFFPAMTKIVGTLGAKSRSVEVLSACLKAGMSVARFDFSLGDTKYHQETLEN  
LKSAIKTTKKLCSVMLDTAGPELTVLNKSEKPI SLEADATITLTPDEGQEASSEVFPINFDGLSKAVKKGDTIFI  
GQYLFTGSETTSVWLEVDQVKGDDVVICVKN SATLTGSLFTLHAAQIHIDLPTLSDKDKKVI  
STWGVQNKIDFLSLSFTRHAKDVREAREFLCKLGDLSQTLIFAKIEN

>potatoPKCYT5 TC135950

MHSTNHLLEEPIRMASILEPSKPTFFPAMTKIVGTLGPKSRSVEIISSCLESMSVARFDFSWGDTEFHQETLEN  
LRAAVKSKKLCVAVMLDTGGPELQVVKSEHPISLQADALVVLTPDQDKEATPNLLPINFSGLSKSVKKGDTIFI  
GQYLFTGSETTSVWLEVEVKGEDVVICLIKNSATLAGPLYTLHVSQIRIELPTLTDKDKKVISSWAVRNKIDILS  
LSYTRNAEDVRHAREFLSKLGDNLNQTQIFAKIENVEGMGNFDEILGEADGIILSRGNLIGIDLPEKVFVLFQKAAV  
HRCNMAGKPAVVTRVDSMTDNLRPTRAEATDVANAVLDGTDAILLGAETLRGLYPVETISIVGKICAEAEKVY  
QDVYFKRAVKCVGEPMTHTLESIASSAVRAAIKVKASVICFTSSGRAARLIAKYRPPMPVLSVVI  
PRLKTNQLRWTFSGAFARQSLIVRGIFPILADPRHPAESTNATDESILKVALDHGKTAGVIKPHDRVVVFQKVG  
DSSVVKIIELEN

>potatoPKPα1 TC135043

MSHAINFFVSSSSHPATFTISRPSVVFVSTGSLRVPVKKSLRSLVVKASAASDLDESQSSPVLVSENGSGGVLSS  
VTKEYGRNNAVAPSADSSIEVDVTVEAELKENGFRSTRRTKLICTIGPATCGFEQLEALAVEGMNVARINMCHG  
TRDWHRMVIERVRLNEEKGFAVAIMMDTEGSEIHMGLGASSAKAEDGEIWNFTVRAFDPPLPERTITVNYDG  
FAEDVEVGDDLLVDGGMVRFVIEKIGPDVKCRCTDPGLLLPRANLTFWRDGLVREARNAMLP  
TISSKDWLDIDFGIAEGVDFIAVSFVKSAEVIKHLKSYIKARARDGDI AVIAKIESIDSLRNLEEIQASDGAMVARGDLGAQIP  
LEQVPSEQQKIVQLCRQLNRPVIVASQLLESMEIYPIPTRAEVADVSEAVRQRGDALMMLSGESAMGQFPEKALTVLR  
TVSLRIERRWREQKRREVIELPSIASSFSDSISEEICNSAAKMANNLEVDALFVYTKNGHMASLLSRCPDCPI  
FAFTTATSVRRRLNLQWGLMPFRLNYSDDMESNLNKTFSLLKARGMIKSGDLIIAVSDMLQSIQVMNVP

>potatoPKPα2 TC159621

MAVVGDLALMGTKIKLIGKLEKRVFGVPLSSSPRFSFSQTRNLDVSKSRTAVRAVLQVEKIQSSGELKDGSLGFD  
VVSERELKENGFLGLRKTCLVCTIGPACSIDELEKLA IAGMNVARLNMCHNSREWHQDVIRKIKKLNQEKGYCVS  
VMIDTEGNQIQVDLGSSSSVKAEESIWFYFTTEKFEGRPFTIQANYEGFSEGVNSGDEIVIDGGMATFEVIEKV  
GNGLRCKCTDPGLLLPRAKLSFWRDGLLGRDYDLPTLSTKDWSDIVFGISENIDFIAVSFVKDAEAIMHLRDL  
YLTSSKAIKVLAKIESLESRLRLEEIVEASDGIMIRGLDGLVEIPLAQIPSVQKDIYVCRQLNKPVIVASQLLE  
SMVEYPTPTRAEVADVSEAVRQYADALMMLSGESAIGSYGMKALSVLRTTSTRMEQSCREENRQTLHLHQRKLGASL  
PDQIAEQICNCAVEMADNLGVDAIFVYTKHGKMASLLSRNRPNPIFALTNDNSTQMALNLQWGVTPLLTDLSD  
MEGNVKKTVELIKAKGMIKKDDAILVSDIIPISTAQTIFQSIQVMTIT

>potatoPKPβ1 TC149988

MAQVVATR SIQSSFS SP SHGSLQS QVEK LKPPS FASKVLGRNERSNSCRAIRVNMPQI IARRSTRAEPQVLPVSP  
EDVPKSEEQEKYLQAIQQLGDT SVGMWSKPTVRRKTKIVCTIGPSTNTREMIWKLAEAGMNVARMNMSHGDDHASH  
QKVIDLVKEYNAQSKDNVIAIMLDTKGPEVRSGLDLPQPIMLKPGQEFNFTIKRGVGTADCVSVNYDDFVNDVEVG  
DMLLDVGGMMSLVKSKTEESVVKCEVIDGGELKSRRLNVRGKSATLPSITEKDWDDIKFGVDNNDIFYAVSFVK  
DAAVVHELKKNYLKSCGADIHVIVKIESADSI PNLSIIITASDGAMVARGDLGAELPIEEVPLLQEEIINICRSMG  
KAVIVATNMLES MIVHPTPTRAEVSDIAIAVREGADAVMLSGETAHGKFP LKAVKVMHTVSLRTEATIVGGETPA  
NLGQAFKNHMSEMF AFHATMMSNTLGT SIVVFTRTGFMAILLSHYRPSGTIFAFTNDKKVQQR LASYQGVCP IYM  
EFLDCAEETFTSALSLLQKQGMVKEGEQVALVQSGSQPIWRLQSTHNIQVRKVTD

>potatoPKPβ2 TC134739

MATLNLHTGGLHAALKSDAAKSAASLDRLSSAKNIGDLFFSDLRFRHRKRVNGLSQIVAVKSPDHIRGANNNVHA  
SYDDDNSNFVPLTSSSSPYSLGKESVYLNSPRKTKIVCTIGPSTSSKEMIWKLAEAGMNVARMNMSHGDDHASHQ  
KTIDLKVEYNAQFENK VIAIMLDTKGPEVRSGLDVPQPIILLKEGQEFNFTIKRGVSTEDTVSVNYDDFINDVESGD  
TLLVDGGMMSLVVSKTSDVVKCEVIDGGELKSRRLNVRGKSATLPSITENDWDDIKYGVNDQVDFYAVSFVKD  
AKVVHELKDY LKSCNADIHVIVKIESADSI PNLSIIITASDGAMVARGDLGAELPIEEVPLLQEDIIRRCQSMQK  
PVIVATNMLES MIDHPTPTRAEVSDISIAVREGADAVMLSGGTAHGKYPLKAVHVMHVVALRTESSLQNSTSFPS  
QSVAHKGHMGEMFAFHSSTMADTLSTPLIVFTRTGSMAILLSHNRPSSTIFAFTNNERVKQR LALFHGVVPI YME  
FSEDAEETFSRAIKLLVNKSSVKDQGYVTFVQSGAQPIWGRHSTPHIQVRKVQS

>rice1 LOC\_Os03g46910

MATSA AAAASTLPYLVA AASSSAAARRRG AHRIRASSAAA EVEGAMDVVSEAELREKGF MGLRKT KL VCTVGPAC  
VGALPALARGGMGVARVN LCHGGRGWHRAMREVRRLNEEEGFCVSLMVDTEGSQLLVADHGGAA SVKAEDGSEW  
LFTSKRTDESHPFTHMVNFDKFS EDILVGD ELVIDGGMATFEVIEKVGNDLRCKCTDPGLLLPRAKLSFWRNGL  
VERNFG LPTLSAKDWADIEFGIAEGVDCIALSFVKDANDIKYLKTYLSRKSLEHIKIFAKVESLES LKNLKDIE  
ASDGMVARGDLGVQI PLEQIPAIQEAI VDLCRRLNKPVI VASQLLES MV EYPTPTRAEVADVSEAVRQYADAVM  
LSAESAIGAYPQKALAVLRAASERMESWSREENMQKLLPQHQLAIALPDRI SEQICTSAAEMANNLAVDAIFVY  
TKYGHMASLLSRNRPNPIFAFTDNANSRKS MNLYWGVIP LQLPLSNMEDNFNQTIKLMKSKG SVKSGDTVLVV  
ADSDLNRPRAATSVFQSIQVRIVD

>rice2 LOC\_Os10g42100

MAAAAAEIVGSAARMAAPAVRPAPPAAAAAAPPQPRRAVAARSLRTSTSDRVAADLALGSNGSLSAQNI AENT  
ADATSQVVSANSRRKTKIVCTIGPSTNTREMIWKLAEAGMNVARMNMSHGDDHSHQKVIDLVKEYNAKNTDGNVI  
AIMLDTKGPEVRSGLDVPPEPIMLEEGQEFNFTIKRGVSTKDTVSVNYDDFINDVEVGDILLVDGGMMSLAVKSKTA  
DTVKCEVVDGGELKSRRLNVRGKSATLPSITEKDWEDIKFGVENGVDFYAVSFVKDAKVIHELKDY LKSNADI  
HVI PKIESADSI PNLSIIAASDGAMVARGDLGAELPIEEVPLLQEEIVRTRCRSMQKPVIVATNMLES MIDHPT  
TRAEVSDIAIAVREGSDAIMLSGETAHGKFP LKAVKVMHTVAQRTESSLYNPTTSPSLVAHPQALLNEEF SQSQL  
SKMFGSHATMMANTLCTPIIVFTRTGSMAVLLSHYRPSSTIFAFTNEERVKQR LALYQGVVPI YMKFSDDAEETF  
SRAISSLLNAQFVKEGDYVTLVQSGVKS IWREESTHHIQVRKVQG

>rice3 LOC\_Os01g47080

MAQVVAAGTAAAVA VGRPLGGGGSGADALRPAARLSFAPRWCGGSAGAARARRESAVT SVISRAPRLDAEVL P  
VSADDDADEEENFQHLKAIQQLATSANGVWSKPNVRRKTKIVCTIGPSTNTKEMIWKLAEAGMNVARLNMSHGDDH  
ASHQKVIDLVKEYNAQTKDNVIAIMLDTKGPEVRSGLDLPQPIMLTGTQEFNFTIKRGVGTETCVSVNYDDFVNDV  
EVGDMLLDVGGMMSLLVSKTEDSVKCEVIDGGELKSRRLNVRGKSATLPSITDKDWDDIKFGVENQVDYAVS  
FVKDAQV VHELKDYLRSSNADIHVIVKIESADSI PNLSIIITASDGAMVARGDLGAELPIEEVPLLQEEIIRMC R  
SMGKAVIVATNMLES MIVHPTPTRAEVSDIAIAVREGSDGIMLSGETAHGKFP LKAVKVMHTVALRTEATMSGGE  
TPANLGQVFKNHMSEMFAYHSTMMSNTLGT SIVVFTRTGFMAILLSHYRPSGTIFAFTDQERVRQR LALYQGVCP  
VQMEFSDDAEKTFGDALS YLLKHGMVKEGEEVALVQSGRQPIWRSQSTHNIQVRKV

>rice4 LOC\_Os4g58110

MANIDMGKILAGLEND DARVPKTKLVCTLGPASRSVPMLEKLLRAGMNVARFNF SHGTHEYHQETLDNLRQAMHN  
TGVLCAVMLDTKGPEIRTGFLKDGKPIKLTGKQELTVTTDYEIKGDENMITMSYKKL PVDVKPGNVILCADGTIS  
LTVLSCDPKAGTVRCRCENTAMLGERKCNLPGIVVDLPTL TEKD KEDILGWGVPNDIDMIALSFVRKGS DLVTV  
RQLLGQHAKRIKLM SKVENQEGVNFDEILRETDAFMVARGDLGMEIPVEKIFLAQKMMIYKCNLAGKPVV TATQ  
MLES MIKSPRPTRAEATDVANAVLDGTDCVMLS GESAAGAYPEVAVKIMARICVEAESL DNEAVFKEMIR SAPL  
PMSPLESLASSAVRTANKAKAALIVVLTRGGTTAKLVAKYRPRVPILSVVVPVLT TDSFDWTISSEGP ARHSLIY  
RGLVPLLAEGSAKATDSESTE VILDAALKSAVQKQLCKPGDAVVALHRIGVASVIKICIVK

>rice5 LOC\_Os01g16960

MAVMEEQEQEGAAGVMRRRPKTKIVCTLGPASRSVEMIGRLLRAGMNCVARFNF SHGSHEYHQETLDNLRAMESTG  
ILCAVMLDTKGPEIRTGFLKDGKPVQLKKGQEI TVSTDYSIKGDDNMI SMSYKKLAVDLKPGSVILCADGTITLT  
VLHCDKEQGLVRCRCENTAMLGERKVNLP GIVVDLPTL TEKD KEDILKWGVPNKIDMIALSFVRKGS DLVEVRK  
VLGKHAKS IMLMSKVENQEGVANFDDILAQSDAFMVARGDLGMEIPIEKIFYAQKVMIFKCNIQGKPVV TATQML  
ESMIKSPRPTRAEATDVANAVLDGTDCVMLSGETAAGAYPELAVRTMAKICLQAESCVDHAAVFKSITASAPIPM

SPLESLASSAVRTANSAKAALILVLTRGGTTARLVAKYRPSMPLSVVPELKTDSFDWTCSDDEAPARHSLIVR  
GVIPMLSAATAKAFDNEATEEALGFANAKAMGLCNSGESVVALHRIGTASVIKLLTAN

>rice6 LOC\_Os11g10980

MQGANMLLDEPVRLTSLVTPVKPKVFPVSLTKIVGTLGPNSSHVEVIQECLTAGMAVARFDFSWMDASYHQETLNN  
LRKAAQNVNKLCPVMLDTLGPEIQVHNSTGGPIELKAGNHVTITPDLKAPSSEILPIKFGGLAKAVKKGDTLFI  
GQYLFTGSETTSSWLEVVETS GENVECLVTNTATLAGPMFTLHVSKAHVSLPTLSYDKEVISTWGLHNSVDIIS  
LSHTRSAEDVRELRSFLQSHGLQDTQIYAKVENTEGLDHFDEILQEADGVIISRGDLGIDLPEEDVFI SQKTAIK  
KCNLAGKPVIIITRVVDSMIDNLRPTRAEEATDVANAVLDGTDGILLGAETHRGYPVDAVSTVGRICAEAESVYNQ  
LVHFKKLVKHVGDMPHEESVASSAVRTAMKVKAAAIVVFTFSGRAARLVAKYKPPMPVLAVVFPREGSDPTKWR  
SYGTTQARQCFAARGVYPLMASTEEAETGGLTREEYGIKLAQNYGRSVGMLKPYDRLIIFQKIGDSSVVKIIECD  
SS

>rice7 LOC\_Os12g05110

MHSTNLLLEEPIRMASILEPSKPSFFPAMTKIVGTLGPKSRVSDTISSCLKAGMSVARFDFSWGDAEYHQETLEN  
LKVAIKSTKKLCAVMLDVTGPELQVVNKSEASISLEENGTVILTPDQGOEASSQVLPINFAGLAKAVKPGDTIFV  
GQYLFTGSETTSSWLEVSQIKGDDVVCVIKNTATLAGSLFTLHCSQIHIIDLPTLSDEDKEVIRKWGAPNKIDFLS  
LSYTRHVEDVRQAREFLSKLGDLSQTQIFAKIENVEGLNHFDEILQEADGIIISRGNLGIDLPEKVFVLFQKSAL  
HKCNMAGKPAVVTRVVDSDMIDNLRPTRAEEATDVANAVLDGSDAILLGAETLRGLYPVETISIVGKICAEAEKVFN  
QDLYFKRTVKHVGEPMTHLESIASSAVRAAIKVKASVVICFTSSGRAARLIAKYRPTMPVLSVVI PRLKTNQLRW  
SFTGAFFEARQSLIVRGLFPLADPRHPAESTNATNESVLKVALDHGKVSQVVKSHDRVVVCQKVGDSVVKIIECD  
DD

>rice8 LOC\_Os11g05110

MHSTNLLLEEPIRMASILEPSKPSFFPAMTKIVGTLGPKSRAVDTISSCLKAGMSVARFDFSWGDAEYHQETLEN  
LKLAIKSTKKLCAVMLDVTGPELQVVNKSEAAISLEANGTVVLTDPDQGOEASSELPINFSGLAKALKPGATIFV  
GQYLFTGSETTSSWLEVSEVKGDDVVCVIKNSATLAGSLFTLHCSQIHIIDLPTLSDEDKEVIRRWGAPNKIDFLS  
LSYTRHAEDVRQAREFLSKLGDLSQTQIFAKIENVEGLNHFDEILQEADGIIISRGNLGIDLPEKVFVLFQKSAL  
HKCNMAGKPAVVTRVVDSDMIDNLRPTRAEEATDVANAVLDGSDAILLGAETLRGLYPVETISIVGKICAEAEKVFN  
QDLYFKRTVKYVGEPMTHLESIASSAVRAAIKVKASVVICFTSSGRAARLIAKYRPTMPVLSVVI PRLKTNQLRW  
SFTGAFFEARQSLIVRGLFPLADPRHPAESTSATNESVLKVALDHGKASGVKSHDRVVVCQKVGDSVVKIIECD  
DD

>rice9 LOC\_Os07g0181000

MAATAAAAHLLHLAAPRKPSAGPPLPPATLRLPSRRLARLTASCSSGSGNNSAADFPNPNGLLVAPPSAAA  
VAAASSHIDVDVATEADLRENGFRSTRRTKLVTGVPATCGADELEALAVGGMNVARVMCHGDREWHRGVIRAVRRL  
NEEKGFVAVVMMDEGSEIHMGDGAAAAKAEDGEIWTFSVRSFEAPPERTIHVNYEGFAEDVRVGDLELLVDG  
GMARFEVVEKLGPDVKCRCTDPGLLLPRANLTFWRDGSIVRERNAMLPTISSKDWLIDDFGISEGVDFIAVSFVK  
SAEVINHLKSYIAARSRGSDIAVIAKIESIDSLKNLEEIRASDGAMVARGDMGAQIPLEQVPSVQQKIVKLCRQ  
LNKPVIVASQLLESMIEYPTPTRAEVADVSEAVRQRADALMLSGESAMGRYPEKALSVLRSVSLRIEKWWREEKR  
HEELELKDVS SFSDKISEEICISAAKMANKLEVDVAVFYVTNTGHMASLLSRCRPPDCPIFAFTTSTSVRRRLNLQ  
WGLIPFRLSFSDMESNLNRTFSLKARGMIQSGDLVIALSDMLQSIQVMNVP

>sorghum1 Sbi\_0.24758

MAAGDAAAWGEEPVARRRPKTKIVCTLGPARSVEMISRLLRAGMVARFNFVSHGSHHEYHQETLDNLRQAM  
GILCAVMLDTKGPEIRTGFLKDGKPIQLKKGQEIITSTDYSIKGDEKMISMSYKKLVLDLPGSVILCADGTITLT  
VLHSDKEQGLVRCRCENTWMLGERKNVNLPGVIVDLPTLTDKDKEDILKWGVPNKIDMIALSFVRKGS DLVEVRK  
VLGEHAKS IMLMSKVENQEGVANFDDILANSDAFMVARGDLGMEIPIEKIFFAQKVMIFKCNIQGKPVVATQML  
ESMIKSPRTRAEEATDVANAVLDGTDVMSGETAAGAYPELAVQTMAKICLQAESCVDHASVFKSIMASAPIPM  
SPLESLASSAVRTANSAKAALILVLTRGGTTARLVAKYRPSMPLSVVPELKTDSFDWTCSDDEGPARHSLIVR  
VIPMLSAGTAKAFDNEATEEALGFANAKAMGLCNTGESVVALHRIGTASVIKLLTVN

>sorghum2 Sbi\_0.20484

MANIDMAKILADLDRGAGDARVPKTKLVCTLGPARSRTVPMLEKLLRAGMVARFNFVSHGTHEYHQETLDNLRQAM  
HNTGILCAVMLDTKGPEIRTGFLKDGKPIKLTGQEIITVTTDYDIKG DENMIAMS YEKLPVDVKPGNVILCADGT  
ISLAVLSCDPDAGTVRCRCENTAMLGKRCNLP GIVVDLPTL TEKDKEDILGWGVPNDIDMIALSFVRKGS DLV  
TVRQVLGQHAKRIKLMKVENQEGVNFDEILRETDAFMVARGDLGMEIPIEKIFLAQKMMIYKCNIAAGKPVVTA  
TQMLESMIKSPRTRAEEATDVANAVLDGTDVMSGETAAGAYPEVAVKIMARICIEAESLDHEAVFKAMIRSA  
PLPMSPLESLASSAVRTANKAKAALIVVLTRGGTTAKLVAKYRPRVPILSVVVPLVLTDSFDWTISSEGP  
IYRGLIPLLAEGSAKATDSESTEVI EAALKSAVQKQLCKPGDSIVALHRIGVASVIKICIVK

>sorghum3 Sbi\_0.16826

MQGASHMLLEEPVRLASVLSPAKPKVFPVSLTKIVGTLGPKSSHVEVIQECLTAGMSVARFDFSGMDAAHYHQETLD  
NLRKAAQNAKKLCPVMLDTLGPEIQVQNSTGPEIELKAGNHVITPDISKAPSAEILPIKFGDLAKVVKGDTLFI

MGQYLFTGSETTSVWLEVVETSGENVNCLVKNAATLAGPIFTLHVSQVHISLPTLSEYDKHVISTWGCNSVDII  
SLSHTRCAEDVRELRAFLQSHALPDTQIYAKIENSEGLDHFDDILKEADGIIISRGDLGIDLPPENVFMFQKKAI  
HKCNLEKGPVITTRVVDSDMIDNLRPTRAEATDVANAVLDGTDGILLGAETFRGLYPVDAVSTVGRICAE**AETVYN**  
**QPLQFKKVMWVHVGDPMPHEESVASAAVNT**AIKVKAAAIVVFTFSGRAARLISKYRPTMPVLAVIFPREGSDPSKW  
RSYGTQARQCFAVRGVYPLMGSTDEAETGGLTKEEYGIKLAVSYGRSVGIVKPFDRLIIFEKIGDSSVVKIIEC  
EG

>sorghum4 Sbi\_0.7307

MSLRAALADVDMECV

ATGPEEIWRRRPKTKIVCTLGPAASRVEMCARLLRAGMCMVARFNFHSHGSHEYHQETLDNLRKAMDLTGLICAVML  
DTKGPEIRTGFLKDGKPVKLTRGHEITITTDYSIKGDENMISMSYNKIAVDLEPGSTILCADGTITFTVLSCDPV  
QGLVRCRCENSALLGERKNVNLPGVIVDLPTLTKDKVDILQWGVNPNIDMIALSFVRKGSGLKMRVGLDAFMV  
ARGDLGMEIPIEKIFYAQKVMIFKCNVQKPVVATQMLESMIKSPRPTRAETDVANAVLDGTDVMSLSETAA  
GAYPELAVQTMSTRICLQAESHTDYGAVFKLISSAAPIPMSPLESLASSAVRTANISNASLILVLTGRGTTARLVA  
KYRPAIPVITSVVPKMTDDNFNWTCSDERPARHSMIVRGLIPMLSAATAKASDTESTEEAISFAIDHAKKLIK  
KSGDSVVALHRIGASSVIKILTVD

>sorghum5 Sbi\_0.39751

MAAQVVAAGTAVARPLGGGSGLDAAAPRGGGVARMPRERWGGAVAARGRRDRESQVSVISCAPRSQAEVLPVSP  
DDDAVKEEANFQHLKAIQQLATAANGVWSKPNVRRKTKIVCTIGPSTNTREMIWKLAEAGMVARLNMSHGDA  
SHQKVIDLVKEYNASHADNVIAIMLDTKGPEVRSGLDLPQIFLESQOEFTFTIKRGVGTDCVSVNYDDFVNDVE  
VGDMLLVDDGGMSFLVKSCTEDSVKCEVIDGGELKSRRHLNVRGKSATLPSIT**DKDWDDIKFGVDNQVDYAVSE**  
**VKDAQVVHELKDYLRSN**NADIHVIVKIESADSI PNLSIITASDGAMVARGDLGAELPIEBVPLLQEEIIRMCRS  
MGKAVIVATNMLESIMIVHPTPTRAEVSDIAIAVREGADAVMLSGETAHGKFPKAVKVMHTVALRTEATIPGET  
PADLGQAFKNHSEMFAHATMMSNTLRTSIVVFTRTGFMALLSHYRPSGTIFAFTDEERVQRQLALYQGVCP  
**QMEFSDDAEKTFGNALSYLL**KHGMVKDGEVALLQSGNQPIWRSQSTHNIQVRKI

>sorghum6 Sbi\_0.13676

MHSTNLLLEPIRMASILEPSKPSFFPAMTKIVGTLGPKRSRVDTISACLKAGMSVARFDFSWGDAAYHQETLEN  
LKLAIKSTKKLCAVMLDVTGPELQVNNKETTISLENGTVVLTTPHRGQEASSLLPINFSGLAKAVTPGATIFV  
GQYLFTGSETTSVWLEVSEVKGDDVVCIIKNTATLAGSLFTLHCSQIHIDLPTLSDEDKDVIRKWGTPNKIDFLS  
LSYTRHAEDVRQAREFLSKLGDLSQTLIFAKIENVEGLNHDFEILAEADGIIISRGNLGIDLPEKVFVLFQKSAL  
HKCNMAGKPAVVTRVVDSDMIDNLRPTRAEATDVANAVLDGSDAILLGAETLRGLYPVETISTVGRICAEAEKVFN  
QDLYFKRTVKYVGEPMTHLESIASSAVRAAIKVKASVICFTSSGRAARLIAKYRPSMPVLSVVI PRLKTNQLKW  
SFTGAFAEARQSLIVRGLFPMADPRHPAESTNSTNESVLKVALDHGKASGVIKSHDRVVVCQKVGDSVVKI IEL  
DD

>sorghum7 Sbi\_0.50772

MAAAAEIGGFTAARVAAAAALRPAAHAPAAAAAPPQPRRAVAAQSLRTTTAEVLTADLAGTTNGAVHAQMNSEAT  
SEITSQAVISRRTKIVCTIGPSTNTREMIWKLAEAGMVARLNMSHGHDHSHQKVIDLVKEYNTQNTDGNVIAI  
MLDTKGPEVRSQDVPEPIMLKEGQEFNFTIKRGVSTEDTVSVNYDDFINDVEAGDILLVDGGMSLAVKSKTADT  
VKCEVVDGGELKSRRHLNVRGKSATLPSITEKDWEDIKFGVENGVDFYAVSFVKDAKVIHELKDYLKGANADIHV  
IPKIESADSI PNLSIIAASDGAMVARGDLGAELPIEDVPLLQAEIVQTCRSMEKPVIVATNMLESIMIDHPTPT  
AEVSDIAIAVREGADAIMLSGETAHGKYPLKAVKVMHTVALRTESSLYNPTTSPSLVASAQGLQNEEFSPSLSK  
**MFGSHATMMANTLRTPIIIVFTQTGSMVLLSHYRPSSTLFAFTNEERVKQRQLALYQGVIP IHMQFSDDAEETF SR**  
**AISSLLKAQYVKKGDYVTLVQSGVTSIWREESTHHIQVRKVQV**

>sorghum8 Sbi\_0.48209

MYNDSVAVSPFAFHRTKSDHDTPSRAAHNTTHPATSPSHAQLRAASPPRLAISAAATAPSKKVLPPSPPHRTASPF  
HSHFPATAVAMAAAAAASSLLHVPAARRASAAAARSPLSQPPAPTPLFIRLRARRPHRLPLRLRSTSPTAASDL  
TAFPPPSPTGIFASDPHPIIDVDAATEAELRENGFRSTRRTKLVCTVGPATSSPDQLEALAVGGMNVARLNMCHG  
DREWHRDAIRAVRRLNDEKGFVAVVMDTEGSEIHMGLDGGASSVKA**DGEVWTFSVRSFELPLPERTINVN YDG**  
**FAE**DVRVGDPELLVDGGMARFEVIEKIGPDVKCRCTDPGLLLPRANLTFWRDGSIVRERNAMLPTISSKDWLIDIF  
GIAEGVDFIAVSFVKSAEVIKHLKSYIAARGRGSDLAVIAKIESIDSLKNLEEIRASDGAMVARGDMGAQVPLE  
QVPSIQKIVQLCRQLNKPVIVASQLLESMIEYPTPTRAEVADVSEAVRQRADALMLSGESAMGRYPDKALSVL  
SVSLRIEKWWREEKRHEALELQSVSSFSDKISEEICNSAAKMANGLVDAVVFVFTKTGHMASLLSRCPDCPVF  
AFTTSTSVRRRLNLQWGLIPFRLSFSDDMESNLNRTFSLKARGMIQSGDLVIALSDMLQSIQVMNV

>sorghum9 Sbi\_0.31197

MATAARSLHHQGPTPSNPSPHRLPVPSHLRQRHGCCSRRLAASSSDLTSPPEPDPAPNGVHVPWAAAASSVATAA  
AAAFDVAATEAELRENGFRSTRRTKLVCTVGPATCGAAELEALAVGGMNVARVMCHGDREWHRGVIRAVRRL  
NDEKGFVAVVMDTEGSEIHMGLDGGASSAKAEDGEVWTFSVRSSDTSLPDRIIHVNYDGFVAEDVKAGDELFDV  
GMARFEVIEKLGPDVKCRCTDPGLLLPRANLTIWRDGSVVRERNAMLPTISSKDWIDIDFGIAEGVDFVAISFVK  
SAEVINHLKSYISARSRSDIGVIAKIESIDALKNLEEIRASDGIMVARGDLGAQIPLEQVPSIQKIVRMCRQ

LNKPVIVASQLLESMIEYPTPTRAEVADVSEAVRQRADALMLSGESAMGRYPEKALSVLRSVSLRIERWWREEKR  
HEALELQDVSSFSFKISEQICNSAAKMANNLGVDAVFVYTKDGYMASLLSRCRDPDPIFAFTSSMSVRRRLNLQ  
WGLIPFRLSESDDMENLNRTFSLKARGMVQSGDLVIALSDMLQSIQVMNVP

>sorghum10 Sbi\_0.14228

MAASTRTTSSFPYLVAASSPAARRHGASHRIRASVGEAAMDVVSEAELEKGFMGMRKTKLVCTVGPACVEALPA  
LARGGMGVARVNLCHGGREWHRAAMRAVRRLNEEEGFCVTLMVDTEGSQLLVADHGGATSAKAEV GSEWIF TNRR  
ADEAHQFTMHVNFDFKSE GILVGDDELVIDGGMATFEVNEKIGNDLRCCKCTDPGLLLPRAKLSFWRNGKLVQRNFG  
LPTLSTKDWADIEFGIAEGVDCIALSFVNDANDIKQLKAYLSRRSLEHIKVFAKIESLESLSLKNLKDIEASDGVN  
VARGDLGVQIPIEQIPAIQESIVKLCRHLNKPVIVASQLLESMIEYPTPTRAEVADVSEAVRQYADAVMISAESA  
IGAYPQKALSVLRVASERMESWSREENMHKRLPQHQLAIALPDRISEQICNCAVSAANNLAVDAIFVYTKHGHMA  
SLLSRNRPNPPIFAFTDNANSRKSMLNLYWGVIPHLPLSNSMEDNFNKTISLMKSKGSKVPGDTPVLLVSDSLNR  
PCAATSVFQSIQVRLVE

>soybean1 AY128951

MANIDIEGILKQQQPYDGRVPKTKIVCTLGPASRSVEMTEKLLRAGMNVARFNFSGHGDYHQETLNNLKTAMHN  
TGILCAVMLDTKGPEIRTGFLKDGKPIQLKEGQEVITITDYDIKGDPEMISMSYKLPVHLKPGNTILCSDGTIT  
LTVLSCDPDAGTVRCRCENTATLGERKVNLPVGVVLDLPTLTKDKEDILGWGVPNKIDMIALSFVRKGSDLVNV  
RKVLGPHAKNIQLMSKVENQEGVLNFDEILRETDAFMVARGDLGMEIPVEKIFLAQKMMIYKCNLVGKPVVATQ  
MLESMIKSPRPTRAETDVANAVLDGTDCVMLSGESAAGAYPELAVKIMARICIEAESSLDYGAIFKEMIRSTPL  
PMSPLESLASSAVRTANKAKAKLIVVLTTRGGSTAKLVAKYRPAVPILSVVVPVLSTDSFDWTCSDETPARHSLIY  
RGLIPILGEGSAKATDAESTEVI LEAALKSATQRGLCKPGDAVVALHRIGTASVIKICIVK

>soybean2 L08632

MANIDIEGILKQQQPYDGRVPKTKIVCTLGPASRSVEMTEKLLRAGMNVARFNFSGHGDYHQETLNNLKTAMHN  
TGILCAVMLDTKGPEIRTGFLKDGKPIQLKEGQEVITITDYDIKGDPEMISMSYKLPVHLKPGNTILCSDGTIT  
LTVLSCDPDAGTVRCRCENTATLGERKVNLPVGVVLDLPTLTKDKEDILGWGVPNKIDMIALSFVRKGSDLVNV  
RKVLGPHAKNIQLMSKVENQEGVLNFDEILRETDAFMVARGDLGMEIPVEKIFLAQKMMIYKCNLVGKPVVATQ  
MLESMIKSPRPTRAETDVANAVLDGTDCVMLSGESAAGAYPELAVKIMARICIEAESSLDYGAIFKEMIRSTPL  
PMSPLESLASSAVRTANKAKAKLIVVLTTRGGSTAKLVAKYRPAVPILSVVVPVLSTDSFDWTCSDETPARHSLIY  
RGLIPILGEGSAKATDAESTEVI LEAALKSATERALCKPGDAVVALHRIGAASVIKICIVK

>soybean3 AY128952

MANIDIEGILKQQPDDGRVPKTKIVCTLGPASRSVEMTEKLLRAGMNVARFNFSGHGDYHQETLNNLKTAMHNT  
GILCAVMLDTKGPEIRTGFLKDGKPIQLKEGQEVITITDYDIKGDQEMISMSYKLPVHLKPGNTILCSDGTITL  
TVLSCDPDAGTVRCRCENTATLGERKVNLPVGVVLDLPTLTKDKEDILQWGVNPKIDMIALSFVRKGSDLVNV  
KVLEPHAKTIQLMSKVENQEGVLNFDEILRETDAFMVARGDLGMEIPVEKIFLAQKMMIYKCNLVGKPVVATQM  
LESMIKSPRPTRAETDVANAVLDGTDCVMLSGESAAGAYPELAVKIMARICIEAESSLDYGAIFKEMIRSTPLP  
MSPLESLASSAVRTANKAKAKLIVVLTTRGGSTAKLVAKYRPAVPILSVVVPVLSTDSFDWTCSDETPARHSLIY  
GLIPILGEGSAKATDAESTEVI LEAALKSATQRGLCKPGDAVVALHRIGTASVIKICIVK

>tobacco1 Q40546

MATMNLPTGLHVAAPASLDRLSSAKNVGDLFFSDSRHRKRVTNSQIMAVQSLEHIGVNNNVYANYVNFVNP  
SGYSLGQESVYLNSPRKTKIVCTIGPSTSSREMIWKLAEAGMNVARLNM SHGDHASHQRTIDL VKEYNAQFEDKV  
IAIMLDTKGPEVISGDVPKPILLKEGQEFNFSIKRGVSTEDTVSVNYDDFINDVEAGDILLVDGGMMSLAVKSKT  
SDIVKCEVIDGGELKSRRLNVRGKSATLPSITEKDWDIKFGVNNQVDFYAVSFVKDAVVELKDYLKSCNAD  
IHVIVKIESADSI PNLSII SASDGAMVARGDLGAELPIEEVPLLOQEDIIRRCQSMQKPVIVATNMLES MIDHPT  
PTRAEVSDISIAVREGADAVMLSGETAHGKYPLKAVKVMHIVALRTESSLQKSTSSPSQSAAYKSHMGEMFAFHS  
SSMANTLSTPIIVFTRTGSMAIILSHNRPSSTVFATNNERNVQRLALYHGVVPIYMEFSSDAEETF SRAIKLLL  
SKSLVKDGQYVTLVQSGAQPIWRRHSTHHIQVRKVQS

>tobacco2 CK294819

MHSNHLLEEPIRMASILEPSKANFFPAMTKIVGTLGPKSRSVEAISACLKAGMSVARFDFSWGDSEYHQETLEN  
LKAAIKATKKLCAVMLDTVGAELQVVNKKETAISLKAIDVTLTPHQGEASSELPINFAGLAKAVKKGDTIFV  
GQYLFTGSETTSVWLEVDEVNGDDVICVVKNSATLAGSMFTLHASQVHIDLPTLTD RDKEVISTWG VKNKIDFIS  
LSYTRHAEDVREAREFLSKLGLDSQTQIFAKIENVEGLTHFDEILKEADGIILSRGNLIGD

>tobacco3 CN747592 and DW001363

MSQVVATRISIQTSFSSPSHGLQTVQVEKLIKPSFASKVLARNERSKSCSAIRVNPQITARRSVRAEPPVLPVS  
PEDVPKSEEQLQYLQAIRHLGDTSVGMSKPTVRRKTKIVCTIGPSTNTREMIWKLAEAGMNVARLNM SHGDHAS  
HQKVIDLVKEYNAQSKDNVIAIMLDTKGPEVRSGLPQPITLQPGQEF TFKRGVGTADCVSVNYDDFVNDVEV  
GDMLLVDDGGMMSLQVTSKTEESVKCEVVDGGELKSRRLNVRGKSATLPSITEKDWDIKFGVDNKIDFYAVSFV  
KDAAVVHEL TNYLKSCGADIHVIVKIESADSI PNLSII TASDGAMVARGDLGAELPIEEVPLLOQEEIINICRSM  
GKAVIVATNM

>tobacco4 Q40545

MSQALNFFVSSSSSRSPATFTISRPSVFPSTGSLRLLVKKSLRTLVEASSAAAASDLDEPQSSPVLVSENGSGGVL  
SSATQEYGRNAAPGTDSSSIEVDTVTEAELKENGFRSTRRTKLICTIGPATCGFEQLERLAEGGMNVARINMCHG  
TREWHRMVIERLRLNNEEKGFVAIIMMDTEGSEIHMGLGGASSAKAEDGEIWNFTVRSFDPPLPERTVTVNYDG  
FAEDVKVGDDELLVDGGMVRFVIEKIGPDVKCLCTDPLGLLPRANLTFWRDGLKLVREERNAMLPTISSKDWLDIDF  
GIAEGVDFIAVSFVKSAEVIKHLKSYIQARARDSISVIKIESIDSLKNLEEIIQASDGAMVARGDLGAQIPL  
QVPSEQQKIVQICRQLNRPVIVASQLLESMEIYPIPTRAEVADVSEAVRQRGDALMLSGESAMGQFPEKALTVLR  
SVSLRIERMWREQKRHEVIELPSIASSFSDSISEEICNSAAKMANNLEVDALFVYTKNGHMASLLSRCRDCPIF  
AFTTTTTSVRRRLNLQWGLMPFRLSFSDDMESNLNKTFSLLKARGMIKSGDLIIAVSDMLQSIIQVMNVP

>tobacco5 Z29492

MAIENNNNGVNFCTVTKRPKTKIVCTLGPASRSVPMIEKLLRAGMNVARFNFSHGSHDYHQETIDNLRQAMESTGI  
LCAVMLDTKGPEIRTGFLKDAKPVQLKQGQEIITISTDYSIKGDESMICMSYKLAEDVKPQSVILCADGQITFTV  
LSCDKENGLDRCRCENTAVLGERKVNLPVIVDLPTLTDKDKDDILNWGVPNHIDMIALSFVRKGS DLVEVRKL  
LGEHAKNILLMSKVENQEGVANFDDILLNSDAFMVARGDLGMEIPIEKIFLAQKVMYKCNIQGKPVVATATQMLE  
SMIKSPRPTRAEATDVANAVLDGTDCVMLSGETAAGAYPDLAVGTMAKICIEAESTIDYPDVFKRIMSNAVPMS  
PLESLASSAVRTANSAKAALILVLTRGGSTAKLVAKYRPGMPILSVVVPEIKTDSFDWTCSDSPARHSLIFRGL  
VPVLHAGSARASHEESTEEALDFALQHAKTGKLGKQGDSSVALHRVGTASVIKIVTVK

>tobacco6 CK290844

MANIDIAGIMKDLNDGRIPKTKIVCTLGPASRSVPMIEKLLRAGMNVARFNFSHGTHEYHQETLNNLKIAMQNA  
QILCAVMLDTKGPEIRTGFLKDGKPIQLKEGQEIITVSTDYDLKGDEQITMSYKLLVVDLKPNGTILCADGTITL  
TVLSCDPAGGTVRCRCENTATLGERKVNLPVIVVDLPTLTEKDKEDI LEWGVPPNIDMIALSFVRKGS DLVNV  
KVLGPHAKRIQLMSKVENQEGVVNFDEILRETDSFMVARGDLGMEIPIEKIFLAQKMMYKCNLAG

>tomato1 TC170021

MAIENNNNVKRPKTKIVCTLGPESRSVFMVEKLLRAGMNVARFNFSHGSHDYHQETIDNLRQAMENTGILCAVML  
DTKGPEIRTGFLKDGKPVQLKQGQEIITVSTDYSIKGDESTICMSYKLAEDVKPQSVILCADGQITFTVLS  
RGLVRCRCENTALLGERKVNLPVIVVDLPTLTDKDKDDILNWGVPNHIDMIALSFVRKGS DLVEVRKLLGEHAK  
NILLMSKVENQEGVANFDDILANSDAFMVARGDLGMEIPIEKIFLAQKVMYKCNIQGKPVVATATQMLESMIKS  
RPTRAEATDVANAVLDGTDCVMLSGETAAGAYPDLAVGTMARICIEAESTIDYPDVFKRIMANAPVMSPLESLA  
SSAVRTANSAKAALILVLTRGGSTAKLVAKYRPGMPILSVVVPEIKTDSFDWTCSDSPARHSLIFRGLVPLVLA  
GSARASHEESTEEALYFALQHAKTGKLGKQEGDSSVALHRVGTASV

>tomato2 TC170352

MAALNLHTGGLHAALKSDVAVKSAASLDRLSSAKNIGDLFFSDLSFHRKRVNGLCQIVAVKSPDHIRGANNNVHA  
SYDDDDNSNFNLPLTSSSSPYSLGKESVYLNPRKTKIVCTIGPSTSSKEMIWKLAEAGMNVARMNMSHGHDASH  
QKTIDLKVEYNAQFENKVIAMLDLTKGPEVRSRSGDVPKPIILLKEGQEFNFTIKRGVSTEDTVSVNYDDFINDVDS  
DTLLVDGGMMSLVKSKTSDVVKCEVIDGGELKSRRLNVRGKSATLPSITEKDWDDIKFGVDNQVDFYAVSFVK  
DAKVVHELKDYLSKCNADIHVIVKIESADSIPLNLHILTASDGAMVARGDLGAELPIEEVPLLQEDIIRRCRSMQ  
KPVIVATNMLESMIDHSTPTRAEVSDISIAVREGADAIMLSGETAHGKYPLKAVHVMYVVALRTESSLQNSTTSP  
SQSVAHKGHMGEAFHSSTMATLSTPIIVFTRTGSMAILSHKRPSSTIFAFTNNERVKQRLALFLHGVVPIYM  
EFSEDAEETFSAIKLLVNKSSVKDGQYVTLVQSGAQPIWRRHSTHHIQVRKVQS

>tomato3 TC172280

MANIDIAGIMKDLNDGRIPKTKIVCTLGPSSRTVPMIEKLLRAGMNVARFNFSHGTHEYHQETLNNLKIAMQNT  
QILCAVMLDTKGPEIRTGFLTDGKPIQLKEGQEIITVSTDYTIKNEEMI SMSYKLLVVDLKPNGTILCADGQITL  
TVLSCDPPSGTVRCRCENTATLGERKVNLPVIVVDLPTLTEKDKEDI LEWGVPPNIDMIALSFVRKGS DLVNV  
KVLGPHAKRIQLMSKVENQEGVINFDLRETDSFMVARGDLGMEIPIEKIFLAQKMMYKCNLAGKAVVTATQM  
LESMIKSPRPTRAEATDVANAVLDGTDCVMLSGESAAGAYPELAVKIMSRIEAESSLDNEAIFKEMIRCTPLP  
MSPLESLASSAVRTANKARAKLIVVLTRGGSTAKLVAKYRPAVPILSVVVPVLTTSDFDWSISDETTPARHSLVYR  
GLIPLLGEESAKATDSESTEVEILEASLSAVTKGLCKPGDAVVALHRIGSASVIKICIVK

>tomato4 TC179493

PEDVPKSEEQEYQLQAIQQLGDTSVGMSKPTVRRKTKIVCTIGPSTNTREMIWKLAEAGMNVARMNMSHGHDAS  
HQKVIDLVKEYNAQPIMLKPGQEFTFTIQRGVGTADCVSVNYDDFVNDVEVGDMLLVDGGMMSLQVKSKEESVK  
CEVIDGGELKSRRLNVRGKSATLPSITEKDWDDIKFGVDNNDIFYAVSFVKMQQWFMABELFESCGADIHVIVK  
IESADSIPLNLHFIITASNGAM

>tomato5 TC181248

MHSTNLLLEEPIRMASILEPSKPTFFPAMTKIVGTGLPKSRSVEIISSCLESMSVARFDFSWGDAAFHQETLEN  
LRAAVKSKKLCVAVMLDTGGPELQVNVKSEHPISLQADSLVLTDPDQKEATPNLLPINFSGLSKSVKKGDTIFI  
GQYLFTGSETTSVWLEVEVTKGEDVVCLIKNSATLAGPLYTLH

>tomato6 TC182827

MAVVGDLALMGTKIKLTKGFEKRVFVGPLSSSSSRFSFSHVRNLDVRKSRTAVRAVMQVEKIQSSRELKEGSLGFD  
VVSERELKENGFLGLRKTCLVCTIGPACSSIDELEKLAIAGMNVARLNMCHNSREWHQDVIRKIKKLNQEKGYCV  
SVMIDTEGNQIQVDHGSSSSVKAEECSIWYFTTEKFEGRSFPFTIQANYEGFSEGVNSGDEIVIDGGMATFEVIEK  
VGNGLRCKCTDPGLLLPRAKLSFWRDGLLGRDYDLPTLSTKDWSDIVFGISEDIDFIAVSFVKDAEPITHLRDY  
LSTTSSKAIKVLAKIESLESLESLRLEEIVEASDGIMIARGDLGVEIPLAQIPSVQKIDITYVCRQLNKPVIVASQLL  
ESMVEYPTPTRAEVADVSEAVRQYADALMLSGESAIGSYGMKALSVLRTPSTRMEQSCREENRQTLHQRKLGAS  
LPDQIAEQICNCAVEMADNLGVDAIFVYTRHGKMASLLSRNRPNPPIFAFTNDNSTQMALNLQWGVTPLLTDLN  
DMEGNVKKTVELIKAKGMIKKDDAILVVSIDIPIFTARTIFQSIQIMTIT

>tomato7 AW933570

KVKRSSQILEKPCRILMDLAGPKLRTGKLGQPGCVLKI SPKKNAYGQVIYPALVWLSSPGAGSPPAHVSPDAILH  
VDGEELLSKLEVDVVTTLLDARGKQRTLKII SRHPI FSSVGYMAECSKAAAVKSGAKYYIKDKRRKSSAGHVVDI  
PPLKQFI

>tomato8 TC184086

KYHQETLENLKSIAIKSTKKLVRAREFLSKLGDLSQTQIFAKIENEEGLKHFDDILQEADGIILSRGNLIGIDLPP  
EKVFLFQKAAVYKCNMAGKPAVVTRVVDSDMTDNLRPTRAEATDVANAVLDGTDAILLGAETLRGLYPIETISTVG  
KICAEAEKVFNQDLYFKRTVKFVGEPMSHLES IASSAVRAAIKVKASVICFTSSGRAARLIAKYRPTMPVLSVV  
I PRLKTNQLKWSFTGAFEARQSLIVRGLFPMLADPRHPAESTNASNESVLKVALDHGKASGVVKS HDRVVICQKV  
GDASVVKIIIELEG

>tomato9 TC183199

MAGKPAVVTRVVDSDMTDNLRPTRAEATDVANAVLDGTDAILLGAETLRGLYPVETISTVGKICAEAGKVFVNQDLY  
FKKTVKVFGEPMTHLEAIASSAVRAAIKVKASVICFTSSGRAARLIAKYRPTMPVLSVVI PRLKTNQLKWSFSG  
AFEARQSLIVRGLFPMLADPRHPAESNNATNESVLKVALDHGKASGVIKSHDRVVVCQKVG DASVVKIIIELED

>yeast1 NP\_009362

MSRLERLTSLNVVAGSDLRRTSIIIGTIGPKTNNPETLVALRKAGLNIVRMNFSHGSEYEHKSVIDNARKSEELY  
GRPLAIALDTKGPEIRTGTTNDVDYPIPPNHEMIFTTDDKYAKACDDKIMYVDYKNITKVISAGRIIYVDDGVL  
SFQVLEVVDDKTLKVKALNAGKICSHKGVNLPDGDVLDLPALEKDKEDLRFVGNVHMVFASFIRTANDVLTIR  
EVLGEQKDVKIIVKIENQQGVNDFEILKVTDGVMVARGDLGIEI PAPEVLAVQKLIKSNLAGKPVICATQM  
LESMTYNPRPTRAEVSDVGNAILDGADCVMLSGETAKGNYPINAVTTMAETA VIAEQAIAYLPNYDDMRNCTPKP  
TSTTETVAASAVA AVFEQKAKAIIVLSTSGTTPRLVSKYRPNCP IILVTRCPRAARF SHLYRGVFPFVFEKEPVS  
DWTDDVEARINFGIEKAKEFGILKKGDTYVSIQGFKAGAGHSNTLQVSTV

>yeast2 AA032371

MPESRLQRLANLKIQTPELRTSIIIGTIGPKTNSCEAITALRKAGLNIRMNFSHGSEYEFHQSVIDNALKSEQQ  
FPGRPLAIALDTKGPEIRTGRTPNQDFHILVDHQMIFTTDAKFEHSSNDKIMYIDYANLTKVIVPGKLIYVDDG  
ILSFVKLQIMDDANIRVQALNSGYISSRKGVNLPNTDVLPLPSAKDIQDLQFGMRNGIHMVFASFIRAPEDVLT  
IRKVLGTEGEDIKIISKIENQQGLDNFDEILQVTDGVMVARGDLGIEI LAPEVLAIQKLIKCNVAGKPVICAT  
QMLESMTYNPRPTRAEVSDVGNVAVLDGADCVMLSGETAKGDYPVNAVKIMAATALIAESTIAHLALYDDL RDATS  
KPTSTTETVAAAATAAILEQNGKAIIVLSTTGNTARLLSKYRPSCP IILVTRHARTARIAHLYRGVFPFVFEKPKR  
LYDWGEDVHRRLKFGVEMARSFGMVESGDTVVSIIQGFRRGGIGHSNTLRVSTVGEFF
