# Supplementary material
Source: PubMed Central journal article supplement (PMC2577264)
Supplement: pp.108.126516_2.pdf [file pp.108.126516_2.pdf]

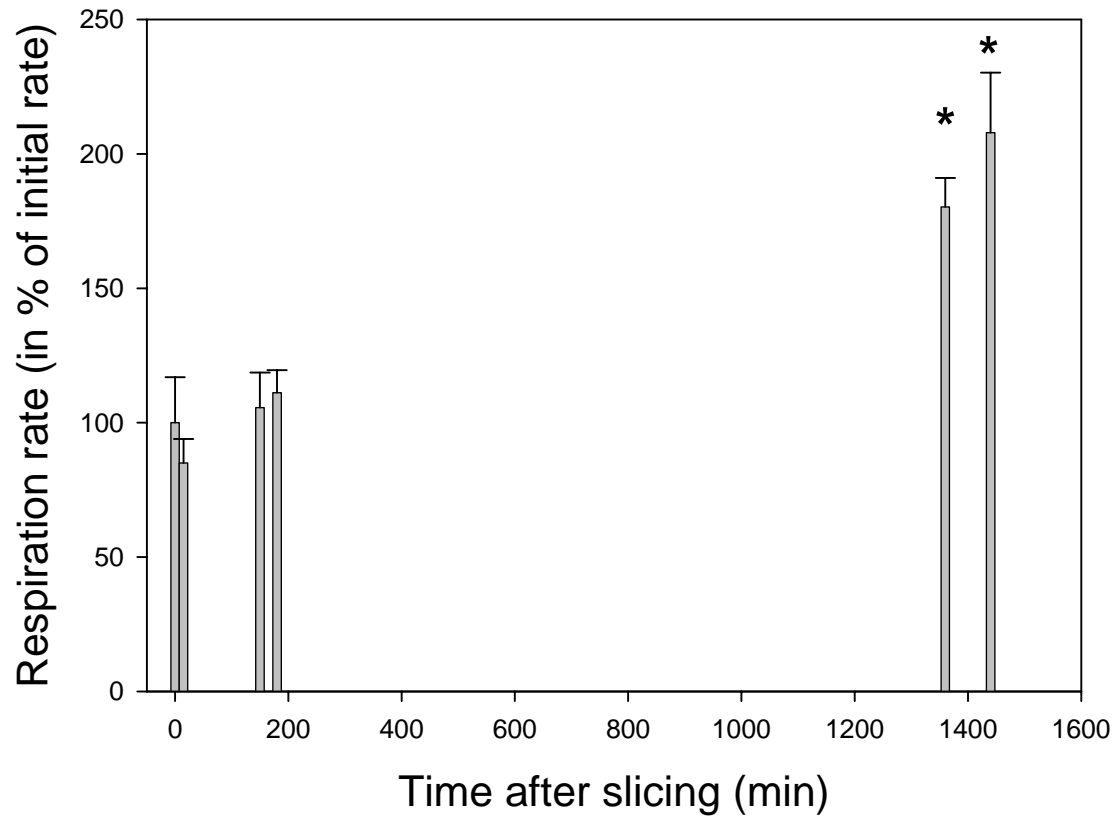

### Supplemental Figure S2

Respiration rates at different time-points after tuber slicing. Slices of growing wild type tubers were incubated for different time intervals, before oxygen consumption rates were measured using Clark-type electrodes. The results show that no wound-induced respiration is observed in the first 3h after slicing. Significant changes are indicated with asterisks.
